# Supplementary material for: Microwear textures associated with experimental near-natural diets suggest that seeds and hard insect body parts cause high enamel surface complexity in small mammals
Source: Frontiers journal article supplement (doi:10.3389/fevo.2022.957427), 2022-09-27
Supplement: Data_Sheet_2.XLSX [file Data_Sheet_2.XLSX]

## Sheet: Table S1
Table S1. Composition of the supplement powder per diet group in % fresh weight. IU = international unit.
	per kg	Vegetable mix	Fruit mix	Seed mix	BSFL	Crickets	Daychicks
Dry matter	g	927	944	934	906	930	904
Crude ash	g	172	432	275	61	266	8.1
Crude fiber	g	0.1	0.2	0.2	0.2	0.2	0.2
NDF	g	0.6	1.2	0.9	1	1	1
ADF	g	0.3	0.4	0.3	0.3	0.3	0.3
Crude lipids	g	0.2	0.4	0.3	0.4	0.4	0.4
Calcium	g	50.7	101	76.4	0	101	0
Phosphorus	g	20	55	10.8	0	0	0
Magnesium	g	0.9	5.3	5	0	10.4	6
Sodium	g	0.1	10.2	10	20	4	2.4
Potassium	g	0	13.3	13	0	0.2	0.1
Chlorine	g	18.5	6.6	5.3	20	4	4
Copper	mg	50	100	10	50	0	50
Fluorine	mg	39	66		1	1	1
Iodine	mg	2	2	2	2	2	2
Iron	mg	367	812	43	43	42	43
Manganese	mg	202	302	0	0	52	156
Selenium	mg	5	5	2.5	3	2	2
Zinc	mg	156	208	0.1	156	0.15	0.2
Lysine	g	59.9	10.3	20.5	0	0	0
Methionine	g	70.3	50.5	40.1	0	0	0
Vitamin A	IU	0	0	25000	26000	26000	26000
Vitamin D	IU	20000	20000	12000	12000	12000	12000
Vitamin E	IU	70	170	340	520	520	370
Vitamin K	mg	23	31	22	21	21	21
Biotin	mg	5.2	5.5	3.4	3.5	3.5	3.5
Choline	mg	13025	12593	1090	1090	1090	1090
Folic acid	mg	4	10	12	15.8	15.8	15.8
Niacin	mg	198	463	379	454	455	455
Pantothenic acid	mg	77	188	154	187	187	187
Riboflavin (B2)	mg	21	51	42	51	51	51
Thiamine (B1)	mg	59	104	83	77	77	77
Pyridoxine (B6)	mg	11	28	76	77	77	77
Cobalamine (B12)	mg	2	2.2	2.1	2.2	2.2	2.2

## Sheet: Table S2
Table S2. Raw measurement data per diet item with multiple repititions. Young's modulus for daychicks was calculated from the regression equation with true Yield stress: Young's = 0.004499 - 10.22*Yield.
Yellow shaded cells higlight the missing values that were derived from the equation.
item	item_spec	machine	tester	Youngs's modulus [Gpa]	Youngs's modulus [Mpa]
stalk celery	no skin	HF-100	60mm	0.004	4
stalk celery	no skin	HF-100	60mm	0.004	4
stalk celery	no skin	HF-100	60mm	0.003	3
stalk celery	no skin	HF-100	60mm	0.004	4
stalk celery	skinside	HF-100	60mm	0.004	4
stalk celery	skinside	HF-100	60mm	0.002	2
stalk celery	skinside	HF-100	60mm	0.002	2
stalk celery	skinside	HF-100	60mm	0.003	3
stalk celery	no skin	HF-100	15mm	0.004	4
stalk celery	no skin	HF-100	15mm	0.003	3
stalk celery	no skin	HF-100	15mm	0.004	4
stalk celery	no skin	HF-100	15mm	0.003	3
stalk celery	skinside	HF-100	15mm	0.003	3
stalk celery	skinside	HF-100	15mm	0.003	3
stalk celery	skinside	HF-100	15mm	0.003	3
stalk celery	skinside	HF-100	15mm	0.003	3
root celery	no skin	HF-100	15mm	0.005	5
root celery	no skin	HF-100	15mm	0.005	5
root celery	no skin	HF-100	15mm	0.005	5
root celery	no skin	HF-100	15mm	0.007	7
root celery	skinside	HF-100	15mm	0.008	8
root celery	skinside	HF-100	15mm	0.007	7
root celery	skinside	HF-100	15mm	0.006	6
root celery	no skin	HF-100	60mm	0.004	4
root celery	no skin	HF-100	60mm	0.003	3
root celery	no skin	HF-100	60mm	0.004	4
root celery	skinside	HF-100	60mm	0.006	6
root celery	skinside	HF-100	60mm	0.006	6
root celery	skinside	HF-100	60mm	0.006	6
root celery	skinside	HF-100	60mm	0.005	5
carrot	no skin	HF-100	15mm	0.007	7
carrot	no skin	HF-100	15mm	0.007	7
carrot	no skin	HF-100	15mm	0.006	6
carrot	skinside	HF-100	15mm	0.007	7
carrot	skinside	HF-100	15mm	0.007	7
carrot	skinside	HF-100	15mm	0.005	5
carrot	xylem	HF-100	60mm	0.008	8
carrot	xylem	HF-100	60mm	0.007	7
carrot	no skin	HF-100	60mm	0.005	5
carrot	skinside	HF-100	60mm	0.005	5
carrot	skinside	HF-100	60mm	0.005	5
carrot	skinside	HF-100	60mm	0.005	5
kohlrabi	no skin	HF-100	60mm	0.004	4
kohlrabi	no skin	HF-100	60mm	0.004	4
kohlrabi	no skin	HF-100	60mm	0.005	5
kohlrabi	skinside	HF-100	60mm	0.006	6
kohlrabi	skinside	HF-100	60mm	0.004	4
kohlrabi	skinside	HF-100	60mm	0.005	5
kohlrabi	no skin	HF-100	15mm	0.004	4
kohlrabi	no skin	HF-100	15mm	0.004	4
kohlrabi	no skin	HF-100	15mm	0.005	5
kohlrabi	skinside	HF-100	15mm	0.007	7
kohlrabi	skinside	HF-100	15mm	0.005	5
kohlrabi	skinside	HF-100	15mm	0.006	6
papaya	skinside	HF-10	60mm	0.000440664	0.440664
papaya	skinside	HF-10	60mm	0.000368402	0.368402
papaya	skinside	HF-10	60mm	0.000584577	0.584577
papaya	inside (with skin)	HF-10	60mm	0.000183229	0.183229
papaya	inside (with skin)	HF-10	60mm	0.000211946	0.211946
papaya	inside (with skin)	HF-10	60mm	0.000277344	0.277344
papaya	skinside	HF-10	15mm	0.000576324	0.576324
papaya	skinside	HF-10	15mm	0.00051304	0.51304
papaya	skinside	HF-10	15mm	0.000726355	0.726355
papaya	inside (with skin)	HF-10	15mm	0.000580326	0.580326
papaya	inside (with skin)	HF-10	15mm	0.000568664	0.568664
papaya	inside (with skin)	HF-10	15mm	0.000568664	0.568664
mango	no skin	HF-10	15mm	0.00010755	0.10755
mango	no skin	HF-10	15mm	5.2511e-05	0.052511
mango	no skin	HF-10	15mm	4.7145e-05	0.047145
mango	no skin	HF-10	15mm	3.3187e-05	0.033187
mango	no skin	HF-10	15mm	3.7046e-05	0.037046
mango	skinside	HF-10	15mm	0.000164754	0.164754
mango	inside (with skin)	HF-10	15mm	0.000623717	0.623717
mango	skinside	HF-10	15mm	0.000447954	0.447954
mango	inside (with skin)	HF-10	15mm	0.000193204	0.193204
mango	skinside	HF-10	15mm	0.000102708	0.102708
mango	inside (with skin)	HF-10	15mm	5.6109e-05	0.056109
mango	skinside	HF-10	15mm	0.000141683	0.141683
mango	inside (with skin)	HF-10	60mm	0.000135727	0.135727
mango	inside (with skin)	HF-10	60mm	0.000104595	0.104595
mango	inside (with skin)	HF-10	60mm	0.000122227	0.122227
mango	inside (with skin)	HF-10	60mm	0.000149275	0.149275
mango	skinside	HF-10	60mm	0.000180642	0.180642
mango	skinside	HF-10	60mm	0.000120964	0.120964
mango	skinside	HF-10	60mm	0.000168333	0.168333
mango	skinside	HF-10	60mm	0.000163641	0.163641
banana	slice	HF-10	60mm	0.000214731	0.214731
banana	slice	HF-10	60mm	0.000273766	0.273766
banana	slice	HF-10	60mm	0.000199169	0.199169
banana	slice	HF-10	60mm	0.000172476	0.172476
banana	cube	HF-10	15mm	0.000164365	0.164365
banana	cube	HF-10	15mm	9.3316e-05	0.093316
banana	cube	HF-10	15mm	8.0683e-05	0.080683
banana	cube	HF-10	15mm	0.000139438	0.139438
banana	cube	HF-10	15mm	0.000150662	0.150662
figseeds	single	HF-10	3mm	0.1	100
figseeds	single	HF-10	3mm	0.1	100
figseeds	single	HF-10	3mm	0.1	100
figseeds	single	HF-10	3mm	0.1	100
figseeds	single	HF-10	3mm	0.1	100
figseeds	single	HF-10	3mm	0.1	100
figseeds	single	HF-10	3mm	0.09	90
figseeds	single	HF-10	3mm	0.09	90
figseeds	single	HF-10	3mm	0.08	80
figseeds	single	HF-10	3mm	0.08	80
figseeds	single	HF-10	3mm	0.07	70
figseeds	single	HF-10	3mm	0.05	50
apple	skinside	HF-100	60mm	0.003	3
apple	skinside	HF-100	60mm	0.003	3
apple	skinside	HF-100	60mm	0.003	3
apple	no skin	HF-100	60mm	0.002	2
apple	no skin	HF-100	60mm	0.002	2
apple	no skin	HF-100	60mm	0.002	2
apple	no skin	HF-100	60mm	0.002	2
apple	skinside	HF-100	15mm	0.003	3
apple	skinside	HF-100	15mm	0.001	1
apple	skinside	HF-100	15mm	0.004	4
apple	skinside	HF-100	15mm	0.002	2
apple	no skin	HF-100	15mm	0.002	2
apple	no skin	HF-100	15mm	0.001	1
apple	no skin	HF-100	15mm	0.001	1
corn		HF-100	60mm	0.03	30
corn		HF-100	15mm	0.05	50
corn		HF-100	15mm	0.04	40
corn		HF-100	15mm	0.03	30
barley		HF-100	60mm	0.04	40
barley		HF-100	60mm	0.03	30
barley		HF-100	60mm	0.05	50
barley		HF-100	15mm	0.06	60
barley		HF-100	15mm	0.06	60
barley		HF-100	15mm	0.05	50
barley		HF-100	15mm	0.05	50
barley		HF-100	15mm	0.04	40
barley		HF-100	15mm	0.04	40
oats		HF-100	60mm	0.03	30
oats		HF-100	60mm	0.03	30
oats		HF-100	60mm	0.04	40
oats		HF-100	15mm	0.07	70
oats		HF-100	15mm	0.06	60
oats		HF-100	15mm	0.05	50
oats		HF-100	15mm	0.05	50
oats		HF-100	15mm	0.03	30
oats		HF-100	15mm	0.01	10
sunflower seeds		HF-100	60mm	0.003	3
sunflower seeds		HF-100	60mm	0.005	5
sunflower seeds		HF-100	60mm	0.006	6
sunflower seeds		HF-100	15mm	0.009	9
sunflower seeds		HF-100	15mm	0.007	7
sunflower seeds		HF-100	15mm	0.005	5
sunflower seeds		HF-100	15mm	0.005	5
sunflower seeds		HF-100	15mm	0.004	4
sunflower seeds		HF-100	15mm	0.003	3
wheat		HF-100	60mm	0.01	10
wheat		HF-100	60mm	0.03	30
wheat		HF-100	15mm	0.08	80
wheat		HF-100	15mm	0.07	70
wheat		HF-100	15mm	0.06	60
wheat		HF-100	15mm	0.05	50
wheat		HF-100	15mm	0.05	50
wheat		HF-100	15mm	0.03	30
peas	split in half	HF-100	60mm	0.03	30
peas	split in half	HF-100	60mm	0.02	20
peas	whole	HF-100	60mm	0.1	100
peas		HF-100	15mm	0.2	200
peas		HF-100	15mm	0.2	200
peas		HF-100	15mm	0.1	100
peas		HF-100	15mm	0.1	100
peas		HF-100	15mm	0.07	70
crickets	whole	HF-10	60mm	0.000621278	0.621278
crickets	whole	HF-10	60mm	0.000312682	0.312682
crickets	whole	HF-10	60mm	0.001	1
crickets	whole	HF-10	60mm	0.000996432	0.996432
crickets	gizzard	HF-100	15mm	0.003	3
crickets	gizzard	HF-100	15mm	0.000921935	0.921935
crickets	gizzard	HF-100	15mm	0.001	1
crickets	gizzard	HF-100	15mm	0.001	1
crickets	head	HF-100	15mm	0.000671593	0.671593
crickets	head	HF-100	15mm	0.000832872	0.832872
crickets	head	HF-100	15mm	0.000333053	0.333053
crickets	head	HF-100	15mm	0.000909034	0.909034
BSFL		HF-10	60mm	0.006	6
BSFL		HF-10	60mm	0.000798011	0.798011
BSFL		HF-10	60mm	0.002	2
BSFL		HF-10	60mm	0.008	8
BSFL		HF-10	60mm	0.000963548	0.963548
BSFL		HF-10	15mm	0.000559047	0.559047
BSFL		HF-10	15mm	0.000422873	0.422873
BSFL		HF-10	15mm	0.000394558	0.394558
BSFL		HF-10	15mm	0.000325736	0.325736
BSFL		HF-10	15mm	0.000278005	0.278005
BSFL		HF-10	15mm	0.00027274	0.27274
BSFL		HF-10	15mm	0.000145378	0.145378
daychick	mean			0.0034198	3.4198

## Sheet: Table S3
Table S3. Raw measurement data per diet item with multiple repititions. True Yield stress for daychicks was calculated from the regression equation with false Yield stress: trueYield = -0.000314 + 5.26* false Yield. Green shaded cells highlight true Yield stress.
Yellow shaded cells higlight the missing values that were derived from the equation.
item	item_spec	machine	tester	false Yield strength [Gpa] maxF/testerArea	false Yield strength [Mpa] maxF/testerArea	true Yield stress [Gpa] maxF/specArea	true Yield stress [Mpa] maxF/specArea
stalk celery	no skin	HF-100	15mm	0.00023654	0.23654	0.000793079	0.793079
stalk celery	no skin	HF-100	15mm	0.000141471	0.141471	0.000589968	0.589968
stalk celery	no skin	HF-100	15mm	0.000191835	0.191835	0.000704477	0.704477
stalk celery	no skin	HF-100	15mm	0.000161843	0.161843	0.000805725	0.805725
stalk celery	skinside	HF-100	15mm	0.000101859	0.101859	0.000566113	0.566113
stalk celery	skinside	HF-100	15mm	0.000136378	0.136378	0.000531505	0.531505
stalk celery	skinside	HF-100	15mm	0.000136944	0.136944	0.00059947	0.59947
stalk celery	skinside	HF-100	15mm	0.000119967	0.119967	0.000598054	0.598054
root celery	no skin	HF-100	15mm	0.000633224	0.633224	0.00198863	1.98863
root celery	no skin	HF-100	15mm	0.000408568	0.408568	0.00162573	1.62573
root celery	no skin	HF-100	15mm	0.000300485	0.300485	0.00160353	1.60353
root celery	no skin	HF-100	15mm	0.000381972	0.381972	0.00182993	1.82993
root celery	skinside	HF-100	15mm	0.000630961	0.630961	0.00193239	1.93239
root celery	skinside	HF-100	15mm	0.000610589	0.610589	0.00189558	1.89558
root celery	skinside	HF-100	15mm	0.000612287	0.612287	0.00149103	1.49103
carrot	no skin	HF-100	15mm	0.000556279	0.556279	0.00183428	1.83428
carrot	no skin	HF-100	15mm	0.000319733	0.319733	0.00164515	1.64515
carrot	no skin	HF-100	15mm	0.000543263	0.543263	0.00139801	1.39801
carrot	skinside	HF-100	15mm	0.000435176	0.435176	0.00150376	1.50376
carrot	skinside	HF-100	15mm	0.000510441	0.510441	0.0014788	1.4788
carrot	skinside	HF-100	15mm	0.000322562	0.322562	0.00111827	1.11827
carrot	xylem	HF-100	60mm			0.00106357	1.06357
carrot	xylem	HF-100	60mm			0.000991246	0.991246
carrot	no skin	HF-100	60mm			0.00138013	1.38013
carrot	skinside	HF-100	60mm			0.00119407	1.19407
carrot	skinside	HF-100	60mm			0.00149723	1.49723
carrot	skinside	HF-100	60mm			0.0014209	1.4209
kohlrabi	no skin	HF-100	15mm	0.000267097	0.267097	0.000763124	0.763124
kohlrabi	no skin	HF-100	15mm	0.000300485	0.300485	0.00117941	1.17941
kohlrabi	no skin	HF-100	15mm	0.000273322	0.273322	0.00118726	1.18726
kohlrabi	skinside	HF-100	15mm	0.000512125	0.512125	0.00182113	1.82113
kohlrabi	skinside	HF-100	15mm	0.000329911	0.329911	0.00115894	1.15894
kohlrabi	skinside	HF-100	15mm	0.000583993	0.583993	0.00150713	1.50713
papaya	skinside	HF-10	15mm	3.08998e-05	0.0308998	0.000129722	0.129722
papaya	skinside	HF-10	15mm	7.47595e-05	0.0747595	0.000249057	0.249057
papaya	skinside	HF-10	15mm	1.96378e-05	0.0196378	7.41453e-05	0.0741453
papaya	inside	HF-10	15mm	5.08206e-05	0.0508206	0.000161977	0.161977
papaya	inside	HF-10	15mm	6.1064e-05	0.061064	0.000222442	0.222442
papaya	inside	HF-10	15mm	1.85059e-05	0.0185059	6.39671e-05	0.0639671
mango	no skin	HF-10	15mm	5.31975e-06	0.00531975	3.14959e-05	0.0314959
mango	no skin	HF-10	15mm	1.98076e-06	0.00198076	1.32265e-05	0.0132265
mango	no skin	HF-10	15mm	2.03735e-06	0.00203735	1.46038e-05	0.0146038
mango	no skin	HF-10	15mm	1.47142e-06	0.00147142	1.09631e-05	0.0109631
mango	no skin	HF-10	15mm	1.92417e-06	0.00192417	1.37972e-05	0.0137972
mango	skinside	HF-10	15mm	3.44086e-05	0.0344086	0.000163181	0.163181
mango	inside with skin	HF-10	15mm	3.15789e-05	0.0315789	0.000116875	0.116875
mango	skinside	HF-10	15mm	5.28014e-05	0.0528014	0.000219379	0.219379
mango	inside with skin	HF-10	15mm	2.51839e-05	0.0251839	0.000133881	0.133881
mango	skinside	HF-10	15mm	2.01471e-05	0.0201471	6.2288e-05	0.062288
mango	inside with skin	HF-10	15mm	5.14997e-06	0.00514997	2.63225e-05	0.0263225
mango	skinside	HF-10	15mm	9.22467e-06	0.00922467	3.55539e-05	0.0355539
banana		HF-10	60mm			4.66805e-05	0.0466805
banana		HF-10	60mm			5.71256e-05	0.0571256
banana		HF-10	60mm			5.054e-05	0.05054
banana		HF-10	60mm			4.17369e-05	0.0417369
banana		HF-10	15mm	1.04689e-05	0.0104689	3.91811e-05	0.0391811
banana		HF-10	15mm	8.14873e-06	0.00814873	3.17005e-05	0.0317005
banana		HF-10	15mm	1.28456e-05	0.0128456	4.06863e-05	0.0406863
apple	skinside	HF-100	60mm			0.00025996	0.25996
apple	skinside	HF-100	60mm			0.000294692	0.294692
apple	skinside	HF-100	60mm			0.00027276	0.27276
apple	skinside	HF-100	60mm			0.000259861	0.259861
apple	no skin	HF-100	60mm			0.000219858	0.219858
apple	no skin	HF-100	60mm			0.000255806	0.255806
apple	no skin	HF-100	60mm			0.000274671	0.274671
apple	no skin	HF-100	60mm			0.000207937	0.207937
apple	skinside	HF-100	15mm	8.71484e-05	0.0871484	0.00032257	0.32257
apple	skinside	HF-100	15mm	3.45198e-05	0.0345198	0.000166954	0.166954
apple	skinside	HF-100	15mm	7.35669e-05	0.0735669	0.000360931	0.360931
apple	skinside	HF-100	15mm	4.75355e-05	0.0475355	0.00020496	0.20496
apple	no skin	HF-100	15mm	5.82876e-05	0.0582876	0.000187635	0.187635
apple	no skin	HF-100	15mm	3.62175e-05	0.0362175	0.000116642	0.116642
apple	no skin	HF-100	15mm	5.94194e-05	0.0594194	0.00017895	0.17895
apple	no skin	HF-100	15mm	2.88608e-05	0.0288608	0.000135723	0.135723
corn		HF-100	15mm	0.00150755	1.50755	0.00251156	2.51156
corn		HF-100	15mm	0.00364382	3.64382	0.00607055	6.07055
corn		HF-100	15mm	0.00299474	2.99474	0.00498918	4.98918
corn		HF-100	60mm			0.00237156	2.37156
barley		HF-100	15mm	0.00101013	1.01013	0.00564838	5.64838
barley		HF-100	15mm	0.00083753	0.83753	0.00468325	4.68325
barley		HF-100	15mm	0.000753777	0.753777	0.00421492	4.21492
barley		HF-100	15mm	0.000675683	0.675683	0.00377824	3.77824
barley		HF-100	15mm	0.000972214	0.972214	0.00543636	5.43636
barley		HF-100	15mm	0.000798483	0.798483	0.00446491	4.46491
barley		HF-100	60mm			0.00399745	3.99745
barley		HF-100	60mm			0.00571913	5.71913
barley		HF-100	60mm			0.00435771	4.35771
oats		HF-100	15mm	0.000355375	0.355375	0.002512	2.512
oats		HF-100	15mm	0.000248423	0.248423	0.001756	1.756
oats		HF-100	15mm	0.000414227	0.414227	0.002928	2.928
oats		HF-100	15mm	0.000355941	0.355941	0.002516	2.516
oats		HF-100	15mm	0.000424413	0.424413	0.003	3
oats		HF-100	60mm			0.00636179	6.36179
oats		HF-100	60mm			0.00839727	8.39727
oats		HF-100	60mm			0.00483837	4.83837
sunflower seed		HF-100	15mm	0.000405173	0.405173	0.00102581	1.02581
sunflower seed		HF-100	15mm	0.00046742	0.46742	0.00118341	1.18341
sunflower seed		HF-100	15mm	0.000487226	0.487226	0.00123355	1.23355
sunflower seed		HF-100	15mm	0.000463459	0.463459	0.00117338	1.17338
sunflower seed		HF-100	15mm	0.000344058	0.344058	0.00087108	0.87108
sunflower seed		HF-100	15mm	0.000394987	0.394987	0.00100002	1.00002
sunflower seed		HF-100	60mm			0.00118083	1.18083
sunflower seed		HF-100	60mm			0.000824252	0.824252
sunflower seed		HF-100	60mm			0.00188154	1.88154
wheat		HF-100	15mm	0.000854485	0.854485	0.00899323	8.99323
wheat		HF-100	15mm	0.00111366	1.11366	0.011721	11.721
wheat		HF-100	15mm	0.000827889	0.827889	0.00871331	8.71331
wheat		HF-100	15mm	0.000357073	0.357073	0.0037581	3.7581
wheat		HF-100	15mm	0.000643976	0.643976	0.00677768	6.77768
wheat		HF-100	15mm	0.000645108	0.645108	0.00678959	6.78959
wheat		HF-100	60mm			0.00386497	3.86497
wheat		HF-100	60mm			0.00270818	2.70818
wheat		HF-100	60mm			0.00206298	2.06298
peas		HF-100	15mm	0.00186176	1.86176	0.00905917	9.05917
peas		HF-100	15mm	0.000938802	0.938802	0.00396379	3.96379
peas		HF-100	15mm	0.00167615	1.67615	0.00950198	9.50198
peas		HF-100	15mm	0.00144357	1.44357	0.0103573	10.3573
peas		HF-100	15mm	0.000980677	0.980677	0.00574018	5.74018
peas		HF-100	60mm			0.00550711	5.50711
peas		HF-100	60mm			0.00889449	8.89449
peas		HF-100	60mm			0.00774608	7.74608
crickets	full crush	HF-10	15mm	1.86176e-05	0.0186176	4.1125e-05	0.041125
crickets	full crush	HF-10	15mm	5.63621e-05	0.0563621	0.0001245	0.1245
crickets	full crush	HF-10	15mm	1.04689e-05	0.0104689	2.3125e-05	0.023125
crickets	full crush	HF-10	15mm	1.16006e-05	0.0116006	2.5625e-05	0.025625
crickets	half-crushed before, second time	HF-10	15mm	2.84074e-05	0.0284074	6.275e-05	0.06275
crickets	half-crushed before, second time	HF-10	15mm	5.67582e-05	0.0567582	0.000125375	0.125375
crickets	half-crushed before, second time	HF-10	15mm	2.16168e-05	0.0216168	4.775e-05	0.04775
crickets	half-crushed before, second time	HF-10	15mm	1.39208e-05	0.0139208	3.075e-05	0.03075
crickets	gizzard	HF-100	15mm	4.92319e-05	0.0492319	0.00256037	2.56037
crickets	gizzard	HF-100	15mm	9.73321e-05	0.0973321	0.00785246	7.85246
crickets	gizzard	HF-100	15mm	2.82942e-05	0.0282942	0.00376698	3.76698
crickets	gizzard	HF-100	15mm	8.54485e-05	0.0854485	0.0038317	3.8317
crickets	head	HF-100	15mm	7.13014e-05	0.0713014	0.000959034	0.959034
crickets	head	HF-100	15mm	3.79142e-05	0.0379142	0.000807641	0.807641
crickets	head	HF-100	15mm	5.26272e-05	0.0526272	0.000820023	0.820023
crickets	head	HF-100	15mm	4.18754e-05	0.0418754	0.000635653	0.635653
BSFL	whole	HF-10	15mm	3.78577e-05	0.0378577	7.96429e-05	0.0796429
BSFL	whole	HF-10	15mm	5.50039e-05	0.0550039	0.000115714	0.115714
BSFL	whole	HF-10	15mm	5.33063e-05	0.0533063	0.000112143	0.112143
BSFL	whole	HF-10	15mm	3.78011e-05	0.0378011	7.95238e-05	0.0795238
BSFL	whole	HF-10	15mm	0.000166313	0.166313	0.000349881	0.349881
BSFL	whole	HF-10	15mm	0.000151997	0.151997	0.000319762	0.319762
daychick	mean			0.000216136	0.216136	0.000822877	0.822877
daychick	vertebra	HF-100	15mm	0.000169199	0.169199	0.000575989	0.575989
daychick	pelvis	HF-100	15mm	0.000283508	0.283508	0.00117725	1.17725
daychick	muscle	HF-100	15mm	0.000109782	0.109782	0.000263451	0.263451
daychick	muscle	HF-100	15mm	9.56344e-05	0.0956344	0.000189037	0.189037
daychick	foot	HF-100	15mm	0.000186176	0.186176	0.000665285	0.665285
daychick	foot	HF-100	15mm	0.000362732	0.362732	0.00159397	1.59397
daychick	foot and ankle	HF-100	15mm	0.000378577	0.378577	0.00167731	1.67731
daychick	foot and ankle	HF-100	15mm	0.000252384	0.252384	0.00101354	1.01354
daychick	legbone	HF-100	15mm	0.000334438	0.334438	0.00144514	1.44514
daychick	legbone	HF-100	15mm	0.000235974	0.235974	0.000927222	0.927222
daychick	legbone	HF-100	15mm	0.000290865	0.290865	0.00121595	1.21595
daychick	legbone	HF-100	15mm	0.000216168	0.216168	0.000823043	0.823043
daychick	legbone	HF-100	15mm	7.97897e-05	0.0797897	0.000105694	0.105694
daychick	spine	HF-100	15mm	0.000405173	0.405173	0.00181721	1.81721
daychick	muscle	HF-100	15mm	0.000166936	0.166936	0.000564083	0.564083
daychick	muscle	HF-100	15mm	0.000113177	0.113177	0.00028131	0.28131
daychick	integument and muscle	HF-100	15mm	0.000132983	0.132983	0.00038549	0.38549
daychick	integument and muscle	HF-100	15mm	7.69603e-05	0.0769603	9.0811e-05	0.090811

## Sheet: Table S4
Table S4. Raw measurement data per diet item with multiple repititions. TPA hardness for seeds, cricket heads and cricket gizzards was calculated from the regression equation with true Yield stress: Hardness = 0.1966 + 1565.00* true Yield.
Yellow shaded cells higlight the missing values that were derived from the equation.
item	item_spec	machine	tester	penetration depth	Hardness
stalk celery	inside	TEX-100	3mm	2mm	2.02
stalk celery	inside	TEX-100	3mm	2mm	1.53
stalk celery	inside	TEX-100	3mm	2mm	1.73
stalk celery	inside	TEX-100	3mm	2mm	1.82
stalk celery	inside	TEX-100	3mm	2mm	1.77
stalk celery	skinside	TEX-100	3mm	2mm	1.44
stalk celery	skinside	TEX-100	3mm	2mm	2.01
stalk celery	skinside	TEX-100	3mm	2mm	1.73
stalk celery	skinside	TEX-100	3mm	2mm	1.88
root celery	inside	TEX-100	3mm	2mm	1.8
root celery	inside	TEX-100	3mm	2mm	2.76
root celery	inside	TEX-100	3mm	2mm	3.27
root celery	skinside	TEX-100	3mm	2mm	2.66
root celery	skinside	TEX-100	3mm	2mm	3.88
root celery	skinside	TEX-100	3mm	2mm	2.6
carrot	xylem	TEX-100	3mm	2mm	2.86
carrot	phloem	TEX-100	3mm	2mm	3.25
carrot	phloem	TEX-100	3mm	2mm	3.11
carrot	xylem	TEX-100	3mm	2mm	2.84
carrot	phloem	TEX-100	3mm	2mm	3.26
carrot	phloem	TEX-100	3mm	2mm	3.57
carrot	skinside	TEX-100	3mm	2mm	4.79
carrot	skinside	TEX-100	3mm	2mm	4.39
carrot	phloem	TEX-100	3mm	2mm	2.68
carrot	phloem	TEX-100	3mm	2mm	2.85
carrot	phloem	TEX-100	3mm	2mm	2.56
carrot	xylem	TEX-100	3mm	2mm	2.23
carrot	xylem	TEX-100	3mm	2mm	2.38
carrot	xylem	TEX-100	3mm	2mm	2.02
carrot	skinside	TEX-100	3mm	2mm	3.8
carrot	skinside	TEX-100	3mm	2mm	3.54
carrot	skinside	TEX-100	3mm	2mm	3.64
kohlrabi	skinside	TEX-100	3mm	2mm	2.96
kohlrabi	skinside	TEX-100	3mm	2mm	2.6
kohlrabi	inside	TEX-100	3mm	2mm	1.64
kohlrabi	inside	TEX-100	3mm	2mm	1.93
kohlrabi	inside	TEX-100	3mm	2mm	1.98
kohlrabi	skinside	TEX-100	3mm	2mm	2.98
papaya	skinside	TEX-100	3mm	2mm	0.67
papaya	skinside	TEX-100	3mm	2mm	0.76
papaya	inside	TEX-100	3mm	2mm	0.02
papaya	inside	TEX-100	3mm	2mm	0.02
papaya	skinside	TEX-100	3mm	2mm	0.59
papaya	inside	TEX-100	3mm	2mm	0.02
mango	inside	TEX-100	3mm	2mm	0.03
mango	inside	TEX-100	3mm	2mm	0.03
mango	inside	TEX-100	3mm	2mm	0.03
mango	skinside	TEX-100	3mm	2mm	0.18
mango	skinside	TEX-100	3mm	2mm	0.22
mango	skinside	TEX-100	3mm	2mm	0.23
banana	cross-section	TEX-100	3mm	2mm	0.21
banana	cross-section	TEX-100	3mm	2mm	0.18
banana	cross-section	TEX-100	3mm	2mm	0.3
banana	cross-section	TEX-100	3mm	2mm	0.15
banana	outside	TEX-100	3mm	2mm	0.17
banana	outside	TEX-100	3mm	2mm	0.15
banana	outside	TEX-100	3mm	2mm	0.1
banana	outside	TEX-100	3mm	2mm	0.17
apple	skinside	TEX-100	3mm	2mm	2.35
apple	skinside	TEX-100	3mm	2mm	2.03
apple	skinside	TEX-100	3mm	2mm	2.13
apple	inside	TEX-100	3mm	2mm	0.61
apple	inside	TEX-100	3mm	2mm	0.54
apple	inside	TEX-100	3mm	2mm	0.65
apple	inside	TEX-100	3mm	2mm	0.66
crickets	abdomen dorsal	TEX-100	3mm	2mm	0.02
crickets	abdomen dorsal	TEX-100	3mm	2mm	0.02
crickets	abdomen ventral	TEX-100	3mm	2mm	0.01
crickets	head dorsal	TEX-100	3mm	2mm	0.33
crickets	hindleg tarsus	TEX-100	3mm	2mm	0.72
crickets	femur	TEX-100	3mm	2mm	0.16
crickets	head dorsal	TEX-100	3mm	2mm	0.41
crickets	hindleg tarsus	TEX-100	3mm	2mm	1.57
crickets	thorax dorsal	TEX-100	3mm	2mm	0.02
crickets	thorax dorsal	TEX-100	3mm	2mm	0.08
crickets	abdomen dorsal	TEX-100	3mm	2mm	0.02
BSFL		TEX-100	3mm	2mm	0.12308
BSFL		TEX-100	3mm	2mm	0.07
BSFL		TEX-100	3mm	2mm	0.12
BSFL		TEX-100	3mm	2mm	0.09
BSFL		TEX-100	3mm	2mm	0.0933709
BSFL		TEX-100	3mm	2mm	0.0551737
BSFL		TEX-100	3mm	2mm	0.0679061
BSFL		TEX-100	3mm	2mm	0.108933
BSFL		TEX-100	3mm	2mm	0.0905415
daychick	ankle	TEX-100	3mm	2mm	1.29
daychick	leg (foot)	TEX-100	3mm	2mm	1.17
daychick	leg (foot)	TEX-100	3mm	2mm	1.15
daychick	head	TEX-100	3mm	2mm	0.33
daychick	head	TEX-100	3mm	2mm	0.12
daychick	body	TEX-100	3mm	2mm	0.07
daychick	body	TEX-100	3mm	2mm	0.19
daychick	thigh	TEX-100	3mm	2mm	0.06
daychick	head	TEX-100	3mm	2mm	0.16
barley					7.5521
corn					6.43469
oats					6.51764
peas					12.0843
sunflower seed					2.00104
wheat					9.82761
cricket gizzard					7.2436
cricket head					1.45734

## Sheet: Table S5
Table S5. Median paraemter values per individual for each analysed DMTA parameter.
SPEC_ID	Diet	tooth	Sq	Ssk	Sku	Sp	Sv	Sz	Sa	Smr	Smc	Sdc	Sal	Str	Std	Sdq	Sdr	Vm	Vv	Vmc	Vvc	Vvv	Spd	Spc	S10z	S5p	S5v	Sda	Sha	Sdv	Shv	Svd	Sk	nMotif	mea	meh	matf	metf	medf	Tr1R	Tr2R	Tr3R	IsT	Asfc	HAsfc9	Sfrax_epLsar	NewEplsar
2AA5B1	BSFL	M1	0.290144	-1.06886	5.73679	0.927009	1.64266	2.56967	0.218241	65.8288	0.321623	0.741349	5.41436	0.565916	140.124	0.297602	4.04444	0.00926469	0.330927	0.236502	0.282528	0.048399	0.0270976	1.46803	2.17675	0.778504	1.39825	32.9252	35.4308	0.670388	0.490425	0.0325033	0.622628	81.5	57.0372	0.243426	1.48796	0.273176	5074.56	146.25	150.894	90.0002	66.345	9.34829	0.477068	0.00151553	0.0180347
2AA5B2	BSFL	M1	0.452572	-1.0443	5.10902	1.21972	2.11078	3.33049	0.333123	47.8488	0.466626	1.2455	6.21458	0.650602	158.56	0.335749	5.06274	0.0181227	0.484713	0.347253	0.404001	0.0807115	0.0175338	1.743	2.9013	1.13	1.7713	45.7219	48.3126	1.06028	1.00154	0.0240483	0.878732	51.5	82.7244	0.369851	1.49942	0.381335	4723.05	168.744	144.265	130.369	62.551	10.3805	0.376931	0.00311146	0.0183649
2AA5G1	BSFL	M1	0.253344	-1.12897	6.70206	0.939342	1.52068	2.46002	0.189039	59.6145	0.275672	0.621856	5.43845	0.542874	175.377	0.268208	3.3989	0.00943133	0.285129	0.206824	0.245631	0.0394983	0.0247413	1.62896	2.11406	0.826268	1.2878	35.2792	47.0358	0.604659	0.528881	0.030147	0.538039	73	63.565	0.217852	1.12198	0.225584	5247.8	89.9987	150.897	110.529	67.4374	8.08687	0.436339	0.00243488	0.0185343
2AA5G2	BSFL	M1	0.344936	-0.497228	4.02976	1.14291	2.0788	3.22171	0.26985	47.9999	0.414194	0.779798	7.14033	0.493031	127.188	0.263176	3.19546	0.0137316	0.427816	0.3006	0.382411	0.0454043	0.0129597	1.62263	2.34247	0.871032	1.47144	54.3116	60.6461	1.24234	0.802893	0.019197	0.839559	38.25	134.892	0.282289	1.29876	0.24623	4958.52	112.503	155.508	121.925	56.8267	7.0136	0.527681	0.00271177	0.018606
2AA5R1	BSFL	M1	0.222889	-1.28523	7.27206	0.86685	1.49236	2.35921	0.162334	76.7761	0.243606	0.568822	5.43004	0.674743	155.302	0.251014	2.95156	0.00700824	0.250672	0.172026	0.213256	0.0374156	0.0235631	1.68112	1.92588	0.671682	1.25419	36.9698	33.6156	0.669703	0.42051	0.0297173	0.447642	75.2	55.1904	0.195536	1.25017	0.21232	5132.92	63.0027	102.703	149.162	68.5264	6.99852	0.426752	0.00240717	0.0182629
2AA5R2	BSFL	M1	0.28234	-1.15053	6.06394	0.72236	1.62549	2.34785	0.210334	80.7423	0.300919	0.719905	6.31533	0.729144	96.5113	0.233222	2.5343	0.00953682	0.310432	0.226562	0.263764	0.0466681	0.0221771	1.1082	2.00748	0.654484	1.35299	44.5941	45.7945	0.898787	0.698202	0.0258502	0.574378	67.25	73.5527	0.223422	1.00914	0.232925	4967.27	146.25	136.003	128.391	56.7707	5.41324	0.368173	0.00227019	0.0182232
2AA5B1	BSFL	M2	0.431023	-0.654613	4.72954	1.32192	2.29916	3.62107	0.328703	32.9215	0.53493	0.926974	7.27878	0.531171	52.8732	0.306247	4.20346	0.0163237	0.551247	0.349041	0.493628	0.0576195	0.0162863	2.21553	2.68394	1.04208	1.64186	56.1125	51.3737	1.21618	0.754121	0.0246027	0.916924	50.75	138.133	0.308014	1.3133	0.293845	4839.82	78.7488	94.6469	67.4895	72.6266	9.64933	0.410265	0.0013949	0.0179479
2AA5B2	BSFL	M2	0.257412	-1.14367	6.52029	0.698356	1.48654	2.1849	0.194797	86.1898	0.282484	0.633533	5.67542	0.596073	133.13	0.246222	2.87765	0.00829784	0.290739	0.214294	0.24969	0.0410489	0.0227315	1.13308	1.85073	0.614458	1.23627	34.0893	36.1494	0.513947	0.44479	0.0290381	0.560584	68.75	53.8797	0.19815	1.13522	0.242168	4873.49	146.25	150.874	67.4991	66.9373	6.36246	0.37444	0.00184736	0.0181936
2AA5G1	BSFL	M2	0.465835	-0.705787	5.2166	1.41282	2.12331	3.53613	0.350057	22.3934	0.57043	1.06329	6.32574	0.477473	94.064	0.335669	4.92587	0.0200312	0.590499	0.371337	0.523116	0.0673829	0.0137914	2.00684	2.93407	1.1819	1.75216	39.5975	44.0222	0.986565	0.625012	0.0248799	1.01239	40	114.866	0.343961	1.59331	0.322585	4743.11	89.9996	117.124	91.9846	74.27	10.5642	0.263632	0.00176027	0.0179732
2AA5G2	BSFL	M2	0.279762	-1.09977	5.43231	0.784368	1.52487	2.30924	0.20665	72.9479	0.292459	0.774676	5.37615	0.557848	113.31	0.273043	3.56754	0.00983262	0.302272	0.217331	0.252836	0.0494353	0.0330577	1.3383	1.97024	0.657303	1.31294	27.9887	29.4322	0.496685	0.457469	0.0415127	0.551454	108.75	44.0918	0.20067	1.28527	0.250019	4918.15	56.2491	89.9895	160.167	57.8388	8.48773	0.240085	0.00285982	0.0185268
2AA5R1	BSFL	M2	0.350143	-1.55244	7.77482	0.898376	1.94079	2.83916	0.246371	69.198	0.35897	1.02605	5.84658	0.508139	122.69	0.248933	2.79841	0.0114189	0.370424	0.24317	0.306372	0.0640518	0.00949418	2.14435	2.43001	0.728704	1.7013	48.7529	77.7677	0.490594	0.802708	0.0180435	0.587162	25.75	153.698	0.322975	1.43147	0.245595	4711.35	112.498	124.493	128.931	57.9298	5.88834	0.95342	0.00440478	0.0185566
2AA5R2	BSFL	M2	0.584187	-0.383522	3.57521	1.75625	3.10831	4.86457	0.458707	11.0747	0.700226	1.29427	7.97128	0.428959	142.187	0.348914	5.17089	0.0250572	0.725382	0.503962	0.647058	0.078324	0.00769268	2.16478	3.77422	1.37777	2.39645	76.3197	60.309	1.52945	1.56474	0.0117123	1.49458	25.5	149.398	0.442231	1.81988	0.35791	4819.86	101.251	107.871	150.87	76.2956	10.6898	0.477679	0.00193747	0.0177442
2AA4B1	crickets	M1	0.308983	-0.99572	4.96122	0.906962	1.63853	2.54549	0.235161	70.0341	0.338853	0.826762	4.73709	0.577614	106.371	0.314541	4.65328	0.0094717	0.34825	0.260719	0.297484	0.0507661	0.0275827	1.52051	2.17942	0.781668	1.39776	34.6648	34.4508	0.644113	0.590039	0.0347903	0.627724	84	52.6229	0.267415	1.53863	0.328913	4899.34	22.4995	123.754	139.637	67.4088	10.3599	0.544381	0.00202957	0.018386
2AA4B2	crickets	M1	0.445522	-1.31113	7.94976	1.44204	2.39085	3.83289	0.327547	30.8501	0.467218	1.14992	6.17743	0.556566	18.8812	0.31408	4.03082	0.0138968	0.481165	0.360289	0.406945	0.0742195	0.010742	3.83335	2.80013	1.02874	1.7714	56.0184	44.5856	1.32489	1.06047	0.0150388	0.831268	32	139.839	0.409571	1.62863	0.320943	4710.06	56.252	72.1065	72.1279	46.531	8.54903	0.770066	0.00374695	0.0191658
2AA4G1	crickets	M1	0.282498	-0.944001	5.23816	0.963705	1.50298	2.46668	0.21707	62.5494	0.310974	0.704287	6.72673	0.671294	76.295	0.254277	3.09131	0.00953187	0.320499	0.244369	0.277772	0.0427272	0.0227869	1.54596	2.0261	0.741203	1.2849	37.3074	35.4953	0.574352	0.452164	0.0286639	0.604248	70.2	61.8111	0.210476	1.08141	0.222086	5105.16	72.0048	122.296	122.282	64.3229	7.09621	0.284838	0.00241476	0.0181841
2AA4G2	crickets	M1	0.49279	-0.149193	3.50616	1.39001	1.88376	3.27377	0.388448	22.3181	0.594034	1.09907	7.43512	0.585603	139.004	0.371765	5.89803	0.0206511	0.614646	0.434586	0.550133	0.0645128	0.0200518	3.14433	2.92925	1.17359	1.75566	35.7122	29.9692	0.676035	0.375993	0.0221771	1.22511	54.6667	70.1092	0.318925	1.49652	0.340805	4996.72	104.995	96.1912	113.8	54.3191	13.6298	0.692342	0.00239896	0.0181789
2AA4R1	crickets	M1	0.32609	-0.9944	5.47798	0.938664	1.80051	2.73917	0.243163	61.0356	0.349452	0.886031	5.95598	0.594287	25.5521	0.312161	4.65423	0.00941626	0.358822	0.257994	0.30173	0.0570919	0.0373129	1.34281	2.36938	0.810601	1.55878	27.0086	29.5451	0.563151	0.51578	0.0447423	0.667986	117.2	40.3954	0.22285	1.28638	0.271811	5357.68	89.9936	71.9922	57.0486	69.1283	11.0546	0.29949	0.00153036	0.0180768
2AA4R2	crickets	M1	0.379643	-0.884468	5.19271	1.18504	2.13639	3.32143	0.28171	39.0154	0.418347	0.994694	6.8386	0.688669	111.453	0.314486	4.66525	0.0145483	0.432915	0.302624	0.372168	0.0607472	0.0178525	2.20255	2.84102	1.03159	1.80943	43.3452	50.0051	0.998932	0.812332	0.0243393	0.772051	56	80.4866	0.286286	1.40184	0.258073	5155.91	116.993	154.59	124.423	62.246	11.2641	0.404599	0.00268982	0.0183181
2AA4B1	crickets	M2	0.377858	-1.21963	5.40793	1.08505	2.18439	3.26944	0.280972	51.9747	0.392634	1.0751	5.26718	0.63789	134.314	0.387977	6.28496	0.0119105	0.404529	0.302651	0.33444	0.0700894	0.0218999	2.8882	2.9274	0.92412	2.00328	34.1179	33.897	0.714349	0.725674	0.0290381	0.675825	70.5	66.0921	0.338148	1.8068	0.337833	4989.55	78.749	128.379	128.377	80.0481	14.8772	0.453886	0.00223144	0.0179253
2AA4B2	crickets	M2	0.513612	-0.512576	4.04492	1.78032	2.71133	4.49165	0.404702	22.1157	0.598499	1.13762	7.16309	0.616456	121.249	0.353139	5.2116	0.0219678	0.620422	0.453608	0.552965	0.0674576	0.00776198	1.6983	3.61464	1.23768	2.37695	55.7292	97.5826	1.36039	2.71635	0.0135835	1.27671	24.5	172.906	0.467575	2.16495	0.380688	4679.7	146.249	119.114	114.489	74.297	10.2616	0.38228	0.00272778	0.0179855
2AA4G1	crickets	M2	0.44287	-1.00299	5.64819	1.46209	2.6828	4.14489	0.328773	23.2759	0.502378	1.14797	6.46513	0.566346	65.1169	0.365877	5.04639	0.0151786	0.517467	0.338589	0.44211	0.0753563	0.0127518	4.27293	3.48823	1.30285	2.18538	66.3433	37.069	1.25303	0.732555	0.0124746	0.909873	42.75	113.449	0.377284	2.26801	0.351603	4831.86	67.5012	130.36	67.5047	77.4351	11.6655	0.773986	0.00222935	0.0175672
2AA4G2	crickets	M2	0.551234	-1.08677	5.76642	2.5534	4.01736	6.57076	0.408179	7.59131	0.593958	1.46347	6.23838	0.630969	72.3707	0.46213	7.46354	0.019207	0.613039	0.422024	0.515086	0.097953	0.00776198	6.08611	4.60812	1.6862	2.92192	72.0636	60.6243	3.18649	1.61397	0.0117123	1.07558	28.5	170.005	0.554885	2.38741	0.422545	4794.26	89.9897	56.2506	51.6094	76.9099	16.4267	0.786464	0.0018143	0.0180341
2AA4R1	crickets	M2	0.678389	-0.640844	5.56	2.74532	4.37218	7.11751	0.51283	19.3355	0.826424	1.42481	7.24146	0.655379	79.3753	0.60856	13.2147	0.0314811	0.858072	0.550277	0.76863	0.0894417	0.0132369	6.64151	6.02101	2.19773	3.82328	51.2541	45.9642	1.55418	1.16933	0.0201673	1.4828	42.75	87.9435	0.512343	3.14246	0.505614	5048.45	67.4981	59.0724	74.1144	60.632	28.0904	0.466845	0.00225378	0.0178273
2AA4R2	crickets	M2	0.606845	-0.612105	4.79606	1.87247	2.78798	4.66046	0.46123	18.5558	0.729051	1.37367	8.6789	0.740993	139.567	0.319521	4.40666	0.0256538	0.754695	0.498022	0.671737	0.082958	0.00589079	3.86389	3.67946	1.50107	2.1784	59.0729	63.6172	1.17822	0.694905	0.00935596	1.36062	18.75	218.314	0.489347	1.64989	0.325715	4915.58	89.9978	123.749	117.133	71.952	8.82699	0.706473	0.00201388	0.0175409
2AA6B1	daychicks	M1	0.313346	-0.887117	5.73331	1.22811	1.80106	3.02917	0.231067	27.7587	0.325121	0.795622	5.88049	0.652594	163.185	0.289136	3.78946	0.0136844	0.338773	0.245027	0.286226	0.0525468	0.0124746	1.85702	2.46317	0.942742	1.52043	33.8407	46.1543	0.556281	0.60229	0.0284837	0.607454	35.75	109.117	0.299771	1.35684	0.261486	5010.17	33.7526	130.38	83.3793	64.3429	8.48816	0.472598	0.00298994	0.0179301
2AA6B2	daychicks	M1	0.239398	-1.17257	7.31093	1.0329	1.83211	2.86501	0.175314	65.6651	0.259464	0.582669	6.21628	0.587236	131.761	0.222955	2.19503	0.0100242	0.2694	0.185966	0.231269	0.0381314	0.0110192	2.57728	2.09196	0.745913	1.34604	74.2355	50.6564	1.00528	0.53547	0.0166328	0.492082	35.75	117.793	0.214945	1.20014	0.175416	5063.62	179.994	120.257	120.935	59.2377	5.08911	0.815322	0.00279881	0.0184593
2AA6G1	daychicks	M1	0.200445	-0.906483	5.27923	0.544687	1.1414	1.68609	0.147113	96.2127	0.215755	0.522394	6.40104	0.730481	82.5015	0.186818	1.68756	0.00759675	0.223308	0.150208	0.187709	0.0355986	0.0182268	1.29733	1.53864	0.484834	1.0538	44.3731	35.039	0.460682	0.302317	0.0220385	0.401084	52.75	71.2184	0.168903	1.01343	0.167787	4835.03	78.7516	112.505	128.375	71.3392	3.65848	0.522874	0.0019019	0.0182102
2AA6G2	daychicks	M1	0.350045	-1.01162	6.32352	1.22134	2.26023	3.48157	0.260103	34.2801	0.384305	0.854563	5.65259	0.718815	54.2473	0.310242	4.20348	0.0141964	0.398551	0.278218	0.342758	0.0557924	0.0118093	2.56333	2.74743	1.01578	1.73165	47.1266	36.4687	1.18246	0.357695	0.0177417	0.723038	33.2	131.091	0.354033	1.43454	0.277098	4869.09	45.0022	73.5927	57.7005	76.3987	9.59878	0.737895	0.00126746	0.0175118
2AA6R1	daychicks	M1	0.279262	-1.34	7.83664	0.869562	2.02657	2.89613	0.207721	69.1555	0.314553	0.66705	6.88452	0.601473	111.626	0.249316	2.97572	0.0090572	0.323554	0.225815	0.280078	0.0434763	0.0112964	2.49688	2.19521	0.765837	1.42937	69.8706	70.743	0.93111	0.734593	0.0170486	0.594676	36.5	125.074	0.254024	1.28504	0.201084	5019.83	78.7496	101.496	60.8706	60.1841	6.9703	0.757192	0.00269547	0.0182303
2AA6R2	daychicks	M1	0.259921	-1.21686	5.8017	0.64254	1.9142	2.55674	0.195638	90.5379	0.278072	0.69977	6.66403	0.435252	122.374	0.266248	3.21265	0.00726945	0.285301	0.212868	0.24041	0.0448911	0.017811	1.61235	1.96176	0.546399	1.41536	34.6179	36.7015	0.639616	0.362349	0.0305628	0.534436	50	93.6594	0.220797	1.27058	0.207692	5194.01	128.391	107.865	136.975	65.5889	7.52434	0.367165	0.00272794	0.0174253
2AA6B1	daychicks	M2	0.412871	-0.576878	5.07958	1.58435	1.83947	3.42382	0.312384	37.3278	0.442488	1.02281	6.59264	0.620446	142.446	0.291396	3.85409	0.0174463	0.460025	0.346864	0.398125	0.0618999	0.0114351	1.73616	2.75924	1.14785	1.61139	53.0177	155.706	1.17169	5.334	0.0185733	0.836555	33.25	163.823	0.373365	1.47513	0.285482	4789.71	128.386	117.121	155.526	65.3559	7.99746	0.491391	0.00303335	0.0185017
2AA6B2	daychicks	M2	0.616709	-1.08764	5.55297	1.72745	3.19318	4.92064	0.453383	9.8237	0.659867	1.68924	6.56053	0.425052	32.8196	0.451872	7.48327	0.0225689	0.682459	0.473132	0.57298	0.109479	0.00935596	5.82768	4.30738	1.53778	2.7696	56.9442	24.4906	1.22858	0.499085	0.0165635	1.14557	28.5	142.616	0.587753	2.42869	0.450099	4712.13	33.7554	53.1523	74.1113	63.546	16.7285	0.894754	0.00343476	0.0185196
2AA6G1	daychicks	M2	0.251491	-1.78143	9.09497	1.29685	2.2596	3.55645	0.18034	44.6509	0.247764	0.710021	6.42262	0.686099	94.1223	0.274496	2.89906	0.00600442	0.253691	0.185708	0.205885	0.0478066	0.00838571	5.62104	2.61191	0.884165	1.72775	60.3264	45.4994	0.73166	0.784532	0.0142072	0.450613	26	148.481	0.248879	1.44066	0.1854	4846.45	56.2625	101.255	136.841	77.3036	7.54578	0.682667	0.00136617	0.0174814
2AA6G2	daychicks	M2	0.540296	-0.148079	5.09696	2.49179	2.81931	5.3111	0.398362	14.8564	0.627036	1.1769	6.60473	0.574745	53.8367	0.348546	4.78193	0.0297369	0.656648	0.407229	0.57715	0.0794973	0.00563667	4.4596	3.82074	1.62158	2.19916	70.8617	33.7078	1.04382	0.780902	0.0117354	1.09952	16.6667	252.348	0.547139	1.75727	0.320567	4905.81	60.0015	44.9965	111.19	67.704	9.55927	0.673199	0.00324809	0.0177893
2AA6R1	daychicks	M2	0.31521	-1.03582	5.74742	1.70401	1.81374	3.51775	0.23743	28.2134	0.344591	0.796881	5.75901	0.518964	87.5671	0.320354	4.323	0.0115471	0.35619	0.258319	0.304558	0.0516317	0.0139993	4.5779	2.73222	1.19149	1.54073	44.3194	37.9728	1.10885	0.659471	0.0279986	0.666088	43.75	90.9048	0.288053	1.43339	0.245375	5024.3	123.744	56.2583	29.1182	74.4305	10.6902	0.597001	0.00232575	0.0182784
2AA6R2	daychicks	M2	0.540449	-0.698481	5.42656	1.841	3.119	4.96	0.401808	29.2001	0.630311	1.09728	6.87024	0.715783	140.914	0.406287	6.65666	0.0273743	0.657618	0.423982	0.582572	0.0750466	0.0144151	4.98289	3.88374	1.60684	2.2769	50.5646	36.3543	1.75656	0.623587	0.0206062	1.13229	43	98.1256	0.435706	1.91891	0.358243	4777.45	134.997	66.1794	60.0033	64.38	14.6288	0.823165	0.00263251	0.0179936
2AA2B1	fruit	M1	0.395993	-0.347828	3.64766	1.20608	1.87276	3.07883	0.313618	40.3114	0.501266	0.813361	7.25979	0.662988	13.4989	0.296539	3.97721	0.0158202	0.517077	0.35315	0.46959	0.0474869	0.0204445	1.60456	2.55409	1.06145	1.49263	45.4682	54.4235	0.622547	0.56984	0.0258502	0.963577	60	81.8414	0.286416	1.31128	0.2869	5111.76	24.4651	40.3684	83.3712	49.432	9.10362	0.509008	0.00297679	0.0184911
2AA2B2	fruit	M1	0.340426	-0.373316	4.18062	1.17844	1.74055	2.91899	0.257997	43.8405	0.413253	0.767689	5.71598	0.43135	145.318	0.288765	3.84619	0.0156804	0.428919	0.279787	0.379799	0.0491197	0.0218306	1.32156	2.37154	0.943094	1.42845	34.9331	33.7198	0.558188	0.594393	0.0251571	0.698944	64	67.8753	0.255368	1.36674	0.300633	5205.69	112.508	117.132	111.666	64.8448	8.35372	0.4528	0.00201587	0.0175898
2AA2G2	fruit	M1	0.614176	-0.758324	5.23807	1.75528	3.28065	5.03593	0.451441	20.9132	0.670787	1.61294	7.97409	0.507046	95.1302	0.352653	5.24362	0.0220807	0.69278	0.469384	0.58678	0.106	0.00727685	2.48961	4.0574	1.3037	2.7537	67.1493	30.5315	0.768822	0.475117	0.0108113	1.21289	22.25	201.612	0.466477	2.21434	0.344136	4845.64	85.3603	78.7588	74.1109	69.5343	10.9492	0.464614	0.00283093	0.0179708
2AA2R2	fruit	M1	0.367663	-0.806815	5.09929	1.15825	1.72632	2.88457	0.27506	50.2235	0.393339	0.955635	6.26926	0.442833	94.2971	0.298798	4.15285	0.0152287	0.408614	0.293562	0.346871	0.061743	0.0182961	1.58752	2.48377	1.00801	1.47576	35.3729	41.8254	0.769156	0.661764	0.0299945	0.760371	52.4	76.6917	0.288702	1.33017	0.269273	5284.42	72.0118	75.7177	22.9874	58.081	9.25685	0.436221	0.0027523	0.0183064
2AA2G1	fruit	M1	0.656671	-0.612119	4.18608	1.80693	2.85112	4.65805	0.51643	13.2053	0.752499	1.5977	8.61895	0.511165	38.3148	0.325402	4.67979	0.0215359	0.77402	0.590853	0.685169	0.0888509	0.00450472	1.9327	3.41732	1.22777	2.18954	64.2381	84.1471	1.37972	2.36786	0.00942526	1.47936	13.25	280.653	0.591221	1.58533	0.34334	4997.54	67.5039	49.6312	96.6199	54.5256	9.00475	0.6315	0.00282341	0.0178306
2AA2B1	fruit	M2	0.476638	-0.559768	4.66866	1.63737	2.23463	3.87201	0.37119	8.79037	0.548368	1.07203	6.86261	0.5645	145.426	0.262252	3.24562	0.022011	0.570513	0.424197	0.509951	0.0605616	0.00766957	1.72958	2.8897	1.25176	1.63794	97.6301	123.226	2.86157	1.18289	0.00887083	1.01663	23	181.15	0.394122	1.34284	0.273336	4872.46	135	38.8123	60.0082	33.4336	6.38833	0.554862	0.00325614	0.0187043
2AA2B2	fruit	M2	0.45327	-0.985719	7.75604	1.5905	2.89913	4.48963	0.33288	13.2323	0.529825	0.999309	6.49692	0.54995	154.128	0.411762	6.64609	0.0176233	0.547533	0.35188	0.482992	0.0645403	0.0240483	3.67583	3.90388	1.31925	2.58463	37.2803	53.9965	0.727178	1.1615	0.0273055	0.932478	74	67.6217	0.318389	1.94789	0.346442	5232.63	112.506	128.373	85.3785	41.8209	16.0052	0.579024	0.00303147	0.0182461
2AA2G2	fruit	M2	0.613904	-0.221113	2.96928	1.83524	2.07554	3.91078	0.493644	12.5183	0.79107	1.29053	7.64382	0.612822	28.4395	0.28985	3.93708	0.0210469	0.812147	0.56471	0.739427	0.0727193	0.00831641	1.46582	3.10021	1.47314	1.62707	80.0826	105.098	0.955826	1.00739	0.00921735	1.62313	27	184.012	0.485136	1.25986	0.336624	4839.53	6.62217	45.0002	35.7273	23.0152	7.25097	0.376208	0.00523882	0.0195997
2AA2R2	fruit	M2	0.522204	-0.439437	4.5187	1.52239	2.55771	4.0801	0.390728	21.1552	0.61213	1.30962	7.973	0.640316	39.5924	0.31631	4.27106	0.0192621	0.631439	0.408493	0.545612	0.0858263	0.0108113	1.55104	3.33451	1.19143	2.14308	60.0792	55.515	1.05301	0.971868	0.0109037	1.01073	33.6667	122.902	0.364427	1.67573	0.320601	5077.27	89.9989	113.818	98.8048	61.789	8.60372	0.411281	0.00299416	0.0183907
2AA2G1	fruit	M2	0.294732	-0.828638	6.82411	0.852011	1.51669	2.3687	0.23395	66.9726	0.371558	0.64648	6.05234	0.789671	125.687	0.219519	2.42258	0.00885532	0.380391	0.262612	0.342697	0.0376945	0.0205138	1.32095	1.94108	0.706001	1.23508	44.4032	21.3009	0.37618	0.179543	0.026959	0.758625	61.5	114.421	0.243374	1.0576	0.177038	5252.48	128.393	133.035	130.358	41.6911	5.72759	0.45331	0.00266396	0.0184211
2AA3B1	seeds	M1	0.476676	-1.00261	4.48447	1.14457	2.52732	3.67189	0.369739	43.4385	0.51552	1.23223	5.06292	0.586378	83.5802	0.463367	8.99487	0.0137009	0.529182	0.422747	0.451807	0.0773747	0.0260581	2.14543	3.25473	1.04109	2.21364	32.3038	39.0846	1.10845	0.823363	0.0297542	0.98584	81	47.1357	0.379401	2.20494	0.467159	4901.51	75.0073	81.1855	98.8137	73.5515	19.8292	0.259069	0.00178686	0.0180953
2AA3B2	seeds	M1	0.462807	-0.659035	4.18476	1.9571	1.93068	3.88777	0.351491	3.57804	0.524818	1.18423	6.79389	0.62624	150.367	0.384061	6.32771	0.0181645	0.542824	0.376866	0.46776	0.0750644	0.0127518	3.46928	3.30722	1.4442	1.86302	35.262	56.46	1.00382	1.11517	0.029246	1.00863	33.5	108.29	0.390678	1.71046	0.327874	5035.58	135.002	166.777	76.7646	66.3691	15.0402	0.337668	0.00364921	0.0183945
2AA3G1	seeds	M1	0.291616	-0.934974	4.76555	0.887417	1.67871	2.56612	0.227377	64.9238	0.336465	0.706688	5.48325	0.674597	130.875	0.229044	2.49053	0.00820475	0.344715	0.260187	0.301701	0.043014	0.0120588	0.926588	2.05928	0.683504	1.37577	46.0508	66.348	0.637679	1.06434	0.0201673	0.66677	38.5	106.093	0.255276	1.22748	0.239029	4895.2	105.889	134.999	105.889	64.4	5.18479	0.283665	0.00148977	0.018226
2AA3G2	seeds	M1	0.30793	-1.18335	6.46605	0.846218	2.28298	3.1292	0.22867	71.0171	0.343093	0.796757	6.09305	0.602895	81.3156	0.298657	4.02711	0.0104035	0.353476	0.244133	0.30264	0.0508352	0.019197	1.22802	2.4796	0.740995	1.73861	40.603	39.5626	0.85304	0.835885	0.0268204	0.641796	64	63.2326	0.229364	1.53619	0.270738	5095.16	112.5	136.149	88.1633	77.9766	9.28633	0.321657	0.00268548	0.0179593
2AA3R1	seeds	M1	0.384115	-1.06487	5.75493	1.00596	2.07201	3.07797	0.280597	57.011	0.42866	1.03712	5.95253	0.54067	138.497	0.282644	3.5627	0.0127738	0.441555	0.295425	0.376218	0.065337	0.0141379	1.72572	2.59223	0.827868	1.76436	48.6499	42.6844	0.94306	0.668953	0.0193356	0.765958	41.75	118.005	0.315428	1.5629	0.306571	4893.27	139.64	135.009	162.136	61.832	7.22884	0.435521	0.00207158	0.0182294
2AA3R2	seeds	M1	0.441205	-1.27964	5.83287	1.0759	2.18902	3.26492	0.328415	55.9698	0.463714	1.28062	6.67195	0.601965	50.8147	0.34966	5.76051	0.0120396	0.475722	0.355188	0.397777	0.0779442	0.0206524	1.78197	2.92742	0.950906	1.97652	46.6523	39.6338	0.63676	0.506495	0.0241869	0.831644	62.75	77.1522	0.314441	1.56176	0.32773	5107.39	45.0007	62.8717	25.3087	55.9693	13.2813	0.458506	0.00247737	0.0183055
2AA3B1	seeds	M2	0.477524	-0.768287	4.98807	1.36329	2.4673	3.83059	0.359095	25.1382	0.52533	1.18051	6.97527	0.66954	121.57	0.350037	5.50134	0.0173083	0.542723	0.38748	0.466668	0.0760551	0.0164249	1.30653	3.10023	1.09424	2.00599	45.1959	58.5895	1.00465	1.67253	0.0237711	1.03797	54.75	86.3441	0.339599	1.65592	0.351991	5054.61	72.1471	101.258	74.1134	55.5845	12.1936	0.249677	0.00246108	0.0183563
2AA3B2	seeds	M2	0.564201	-0.944137	5.51222	1.80364	3.79045	5.59409	0.421687	8.79538	0.595432	1.45069	6.46303	0.59444	93.1247	0.455512	8.00131	0.0228556	0.618216	0.448126	0.522423	0.0957934	0.0122667	2.78469	4.33492	1.28381	3.05111	60.18	105.957	1.46703	3.55981	0.0190584	1.18901	38.5	165.713	0.476361	2.81903	0.385644	5035.06	134.998	90.0054	101.247	58.5701	18.362	0.513244	0.00264908	0.0186134
2AA3G1	seeds	M2	0.358625	-0.759265	4.64031	1.05566	1.8612	2.91687	0.27711	54.5166	0.409464	0.912116	7.50284	0.510136	102.334	0.23017	2.3531	0.0100037	0.419479	0.312258	0.366269	0.0532103	0.00831641	3.94239	2.43205	0.76259	1.66946	60.6517	53.2639	0.896902	0.612482	0.0143227	0.817023	27.6667	148.142	0.305326	1.50549	0.246017	4664.29	74.9961	90.0005	112.525	35.9816	5.08443	0.739743	0.00263057	0.018232
2AA3G2	seeds	M2	0.501623	-0.851224	3.89364	1.75768	2.42067	4.17835	0.391207	17.5857	0.549339	1.30059	6.98458	0.762158	163.833	0.437897	7.73228	0.0146546	0.563983	0.443469	0.481212	0.0827709	0.0152467	4.87347	3.47648	1.24884	2.22764	48.2731	35.3639	1.08481	0.880663	0.0243024	1.02637	52.3333	71.8027	0.379778	1.82516	0.390869	5035.59	105.011	119.994	141.172	76.427	18.6977	0.471161	0.00113416	0.0179196
2AA3R1	seeds	M2	0.712732	-0.896586	4.83631	2.19719	3.93961	6.13681	0.540622	6.18575	0.745339	1.83217	6.60455	0.44764	128.943	0.458865	7.75017	0.0290836	0.774328	0.591437	0.653147	0.121182	0.00727685	5.03575	4.5552	1.46958	3.08562	56.407	51.7441	1.17785	1.17509	0.0114351	1.31409	22	260.911	0.703453	2.69235	0.455432	4814.26	123.767	91.9912	117.132	53.7184	15.0178	0.59912	0.00305863	0.0174522
2AA3R2	seeds	M2	0.787528	-0.823343	5.35857	2.45958	4.44681	6.90639	0.588438	4.51046	0.905131	1.90846	6.67434	0.758669	59.5807	0.570801	11.2518	0.0316868	0.93697	0.600933	0.811692	0.125278	0.00840881	5.17983	5.81606	1.93854	3.87751	59.0996	112.681	1.57502	6.70038	0.0144151	1.67548	26.3333	153.117	0.641538	2.65752	0.532165	4961.36	53.8161	81.1782	59.9891	78.2572	25.5899	0.768156	0.00177362	0.0177886
2AA1G1	vegetables	M1	0.357007	-0.788316	4.64345	1.17077	1.76502	2.93579	0.270874	49.2321	0.402737	0.9123	7.03058	0.450014	74.6298	0.272453	3.45459	0.0146374	0.417366	0.285377	0.361129	0.056237	0.0179496	1.17211	2.52449	0.975038	1.54945	56.6764	48.2365	0.754348	0.632191	0.0196822	0.796572	55	71.7614	0.249447	1.29006	0.267625	5113.12	90.0087	60.8913	131.194	64.0824	7.58994	0.438544	0.00259805	0.0185015
2AA1G2	vegetables	M1	0.310925	-0.650107	3.5076	0.801268	1.28988	2.09115	0.24879	77.3022	0.354296	0.745967	7.44882	0.511393	66.4382	0.231579	2.81745	0.00925126	0.363545	0.295398	0.319458	0.0440863	0.0241869	1.13248	1.92174	0.741727	1.18002	37.4981	37.5133	0.512659	0.35315	0.0263353	0.689432	68	68.9544	0.21834	1.05743	0.215229	5318.56	33.7447	49.6594	67.5026	70.1452	6.20797	0.516658	0.00270741	0.0181345
2AA1R1	vegetables	M1	0.528956	-0.810331	4.74414	1.35384	2.38088	3.73472	0.388374	45.0839	0.62609	1.38825	6.15021	0.452653	124.565	0.315734	4.62858	0.0195408	0.645643	0.408936	0.557263	0.0883798	0.0176031	1.9741	3.11782	1.20933	1.90849	55.9961	38.7317	0.906642	0.535635	0.020791	1.02199	50.25	123.041	0.387159	1.50218	0.32935	5109.3	89.999	112.497	119.123	40.5522	9.37297	0.335856	0.00370795	0.0190938
2AA1R2	vegetables	M1	0.292471	-0.309775	3.7354	0.876015	1.16968	2.0457	0.229165	68.0268	0.376711	0.597858	6.22876	0.383944	92.3756	0.195931	1.87507	0.0123559	0.389006	0.259887	0.354243	0.0347628	0.0144151	0.75489	1.79505	0.779589	1.01546	36.8002	52.0911	0.390419	0.381672	0.0235631	0.670165	42	108.917	0.209989	0.878351	0.197656	5200.42	56.2453	31.1795	97.004	36.8093	4.00105	0.310806	0.00415697	0.019285
2AA1B1	vegetables	M1	0.257235	-0.418781	5.36927	1.14627	2.12265	3.26893	0.197761	51.2788	0.309825	0.506595	7.01862	0.731107	13.6632	0.205929	1.92583	0.0121978	0.32203	0.212832	0.290898	0.0311318	0.00665312	1.8928	2.02669	0.744739	1.28195	42.9976	68.6504	0.7696	0.586703	0.0108113	0.566043	22.6667	220.476	0.246763	1.26353	0.14693	5372.52	36.1984	59.9927	89.9971	65.2375	4.59648	0.804111	0.00293667	0.0184439
2AA1G1	vegetables	M2	0.552497	-0.249797	3.48814	1.51216	2.23528	3.74745	0.429775	21.5121	0.72145	1.19885	7.86456	0.630949	136.588	0.290779	3.73683	0.0220364	0.743504	0.458017	0.670901	0.0726026	0.00693034	2.36273	3.17652	1.23747	1.93905	62.3878	28.7396	0.775437	0.447238	0.011643	1.26061	17.6667	283.052	0.441167	1.73495	0.317885	4813.1	119.996	98.8117	51.1828	80.9492	7.4056	0.657484	0.00260523	0.0184039
2AA1G2	vegetables	M2	0.517508	-0.71545	4.21858	1.48161	2.06949	3.5511	0.397208	34.4039	0.591821	1.27825	6.46226	0.606327	74.3348	0.375856	6.22339	0.0219202	0.613831	0.4382	0.536007	0.0778238	0.017372	2.03303	3.14015	1.24601	1.89414	41.4475	39.1309	0.70717	0.893067	0.0222695	1.14717	49.6667	74.6509	0.376315	1.58983	0.383873	5001.89	68.8223	68.8332	53.8152	65.5191	13.6292	0.431204	0.00308303	0.0173369
2AA1R1	vegetables	M2	0.693815	-0.254453	3.70424	2.0883	2.62476	4.71306	0.53693	7.13862	0.882533	1.43583	8.41215	0.653824	17.4102	0.348977	5.50882	0.0322015	0.914604	0.581838	0.822259	0.092345	0.0113658	2.65779	3.96983	1.83414	2.13569	62.5158	59.1068	0.781406	0.969014	0.0124746	1.54611	33	111.957	0.434787	1.42895	0.348325	5106.65	105.009	15.0015	74.9851	68.6868	12.156	0.338913	0.00281985	0.0173113
2AA1R2	vegetables	M2	0.530522	-0.64414	4.24924	1.45806	2.86586	4.32392	0.41799	36.1456	0.637573	1.2118	7.40616	0.636451	83.8584	0.345086	5.11965	0.0179736	0.655518	0.469908	0.582806	0.0727122	0.0131478	2.39274	3.3883	1.25995	2.12835	62.3001	61.4441	1.03258	1.52733	0.0148111	1.303	39.8571	127.021	0.412316	1.75938	0.355619	4977.83	102.857	83.5611	97.4807	59.1106	11.0891	0.61449	0.00331193	0.0184013
2AA1B1	vegetables	M2	0.544677	-0.282802	3.80231	2.37328	2.30104	4.67432	0.429272	2.1366	0.677387	1.11863	7.09714	0.44993	116.689	0.370762	5.81433	0.0237186	0.701111	0.472905	0.635754	0.0653565	0.011643	3.72123	3.44677	1.52818	1.91859	71.9882	48.475	1.23574	0.822706	0.0157319	1.30926	37.75	124.296	0.434364	1.61055	0.35216	5145.78	112.499	128.382	103.212	47.6653	13.6467	0.590817	0.00247386	0.0184837

## Sheet: Table S6
Table S6. Descriptive statistics (mean, standard deviation, standard error) for mechanical properties per diet item.
	Young's modulus [Gpa]					Hardness					true Yield stress [Gpa]					false Yield stress [Gpa]
Item	n	mean	Std Dev	Std error		n	mean	Std Dev	Std error		n	mean	Std Dev	Std Error		n	mean	Std Dev	Std Error
carrot	12	-0.00617	0.00111464	0.000321769		17	3.16294	0.74139	0.179814		12	0.001377	0.000247115	0.00033		6	0.000447909	0.000106817	4.3608e-05
kohlrabi	12	-0.00492	0.000996205	0.00028758		6	2.34833	0.574262	0.234441		6	0.001269	0.000358967	0.00047		6	0.000377822	0.000135647	5.53777e-05
root celery	14	-0.0055	0.0013445	0.000359334		6	2.82833	0.699097	0.285405		7	0.001767	0.000191401	0.00043		7	0.000511155	0.000141988	5.36664e-05
stalk celery	16	-0.00325	0.00068313	0.000170783		9	1.77	0.195064	0.0650214		8	0.000649	0.000105293	0.00041		8	0.000153355	4.29915e-05	1.51998e-05
apple	14	-0.00221	0.000892582	0.000238553		7	1.28143	0.837425	0.316517		16	0.000232	6.7036e-05	0.00029		8	5.31945e-05	2.03319e-05	7.18842e-06
banana	9	-0.00017	5.98253e-05	1.99418e-05		8	0.17875	0.0581715	0.0205667		7	4.4e-05	8.2948e-06	0.00043		3	1.04877e-05	2.34849e-06	1.3559e-06
mango	20	-0.00016	0.000141207	3.15749e-05		6	0.12	0.1	0.0408248		12	7e-05	7.06123e-05	0.00033		12	1.59357e-05	1.68302e-05	4.85846e-06
papaya	12	-0.00047	0.00017073	4.92855e-05		6	0.346667	0.361866	0.147731		6	0.00015	7.58552e-05	0.00047		6	4.26146e-05	2.31837e-05	9.46469e-06
figseeds	12	-0.08833	0.0158592	0.00457817
peas	8	-0.1025	0.0677706	0.0239605			12.0843				8	0.007596	0.00227116	0.00041		5	0.00138019	0.000411689	0.000184113
oats	9	-0.04111	0.0183333	0.00611111			6.51764				8	0.004039	0.00230546	0.00041		5	0.000359676	6.99578e-05	3.12861e-05
sunflower seeds	9	-0.00522	0.00192209	0.000640698			2.00104				9	0.001153	0.000309537	0.00038		6	0.000427054	5.47189e-05	2.23389e-05
wheat	8	-0.0475	0.0231455	0.00818317			9.82761				9	0.006154	0.00327845	0.00038		6	0.000740365	0.000255073	0.000104133
barley	9	-0.04667	0.01	0.00333333			7.5521				9	0.0047	0.000727281	0.00038		6	0.000841303	0.000128514	5.24655e-05
corn	4	-0.0375	0.00957427	0.00478714			6.43469				4	0.003986	0.00183776	0.00058		3	0.00271537	0.00109519	0.000632309
crickets whole	4	-0.00073	0.000331579	0.000165789		11	0.305455	0.476201	0.14358		8	6e-05	4.19947e-05	0.00041		8	2.72191e-05	1.90113e-05	6.72151e-06
cricket gizzard	4	-0.00148048	0.000877872	0.000438936			7.2436				4	0.00450288	0.00199907	0.000999533		4	6.50767e-05	2.76561e-05	1.3828e-05
cricket head	4	-0.000686638	0.000221412	0.000110706			1.45734				4	0.000805588	0.000114713	5.73564e-05		4	5.09296e-05	1.29351e-05	6.46756e-06
BSFL	12	-0.00168	0.00256945	0.000741736		9	0.0910005	0.0236019	0.00786728		6	0.000176	0.000124263	0.00047		6	8.37132e-05	5.90675e-05	2.41142e-05
daychicks		-0.0034198				9	0.504444	0.531369	0.177123			0.000822877				19	0.000216136	0.000104528	2.39805e-05
Yellow shaded cells show mean values derived from linear regression equations:
Young's modulus = 0.00499 - 10.22*true Yield stress
Hardness = 0.1966 + 1565.00* true Yield stress
true Yield stress = 0.000314 + 5.26* false Yield

## Sheet: Table S7
Table S7. Mean and weighted mean per mechanical property for each diet.
Diet	Item	Percent	Young's weighed	Young's modulus	Hardness weighed	Hardness	Yield weighed	Yield stress	false Yield weighed	false Yield stress
Vegetable mix	carrot	0.271	0.00167207	0.00617	0.857157	3.16294	0.000373167	0.001377	0.000121383	0.000447909
Vegetable mix	kohlrabi	0.107	0.00052644	0.00492	0.251272	2.34833	0.000135783	0.001269	4.0427e-05	0.000377822
Vegetable mix	root celery	0.322	0.001771	0.0055	0.910723	2.82833	0.000568974	0.001767	0.000164592	0.000511155
Vegetable mix	stalk celery	0.109	0.00035425	0.00325	0.19293	1.77	7.0741e-05	0.000649	1.67157e-05	0.000153355
Vegetable mix	weighted mean			0.00432376		2.21208		0.00114867		0.000343118
	maximum			0.00616667		3.16294		0.001767		0.000511155
Fruit mix	apple	0.127	0.00028067	0.00221	0.162741	1.28143	2.9464e-05	0.000232	6.7557e-06	5.31945e-05
Fruit mix	banana	0.22	3.74e-05	0.00017	0.039325	0.17875	9.68e-06	4.4e-05	2.30729e-06	1.04877e-05
Fruit mix	mango	0.112	1.792e-05	0.00016	0.01344	0.12	7.84e-06	7e-05	1.7848e-06	1.59357e-05
Fruit mix	papaya	0.17	7.99e-05	0.00047	0.0589333	0.346667	2.55e-05	0.00015	7.24448e-06	4.26146e-05
Fruit mix	figseeds	approx. 0.01	0.0008833	0.08833
Fruit mix	weighted mean			0.00129919		0.27444		7.2484e-05		1.80923e-05
	maximum			0.08833		1.28143		0.000232494		5.31945e-05
Seed mix	peas	0.2	0.0205	0.1025	2.41687	12.0843	0.0015192	0.007596	0.000276038	0.00138019
Seed mix	oats	0.15	0.0061665	0.04111	0.977645	6.51764	0.00060585	0.004039	5.39514e-05	0.000359676
Seed mix	sunflower seeds	0.1	0.000522	0.00522	0.200105	2.00104	0.0001153	0.001153	4.27054e-05	0.000427054
Seed mix	wheat	0.25	0.011875	0.0475	2.4569	9.82761	0.0015385	0.006154	0.000185091	0.000740365
Seed mix	barley	0.2	0.009334	0.04667	1.51042	7.5521	0.00094	0.0047	0.000168261	0.000841303
Seed mix	corn	0.1	0.00375	0.0375	0.643469	6.43469	0.0003986	0.003986	0.000271537	0.00271537
Seed mix	weighted mean			0.0521475		8.20541		0.00511745		0.000997584
	maximum			0.1025		12.0843		0.007596		0.00138019
Crickets	crickets	1	0.00073	0.00073	0.305455	0.305455	6e-05	6e-05	2.72191e-05	2.72191e-05
Crickets	gizzard	0.014	2.07268e-05	0.00148048	0.10141	7.2436	6.30403e-05	0.00450288	9.11074e-07	6.50767e-05
Crickets	head	0.068	4.66914e-05	0.000686638	0.0990994	1.45734	5.478e-05	0.000805588	3.46321e-06	5.09296e-05
Crickets	weighted mean			0.000736985		0.46762		0.000164344		2.91991e-05
	maximum			0.00148048		7.2436		0.00450288		6.50767e-05
BSFL	BSFL	1		0.00168		0.0910005		0.000176		8.37132e-05
Daychicks	daychicks	1		0.0034198		0.504444		0.000822877		0.000215048
Yellow shaded cells show mean values derived from linear regression equations:
Young's modulus = 0.00499 - 10.22*true Yield stress
Hardness = 0.1966 + 1565.00* true Yield stress
true Yield stress = 0.000314 + 5.26* false Yield

## Sheet: Table S8
Table S8. Correlations between mechanical properteis and dental microwear texture paraemters for the M1. Significant correlations are highlighted in green.
MP parameter	Young's modulus		max. Young's modulus		Yield stress		max. Yield stress		Hardness		max. Hardness
	Spearman		Spearman		Spearman		Spearman		Spearman		Spearman
DMTA parameter	Spearman ρ	sign.	Spearman ρ	sign.	Spearman ρ	sign.	Spearman ρ	sign.	Spearman ρ	sign.	Spearman ρ	sign.
Sq	-0.0885	0.6188	0.2885	0.098	-0.1464	0.4087	0.2378	0.1756	0.082	0.6449	0.4011	0.0187
Ssk	-0.1263	0.4767	0.1866	0.2906	-0.222	0.207	-0.0262	0.8831	-0.0104	0.9535	0.1315	0.4584
Sku	0.0407	0.819	-0.2244	0.202	0.1111	0.5317	-0.0866	0.6262	-0.0547	0.7587	-0.2437	0.1648
Sp	-0.226	0.1986	0.1158	0.5145	-0.2877	0.0989	0.0315	0.8598	-0.0761	0.6689	0.1551	0.3811
Sv	0.1004	0.5721	0.2909	0.0951	0.0595	0.7382	0.2253	0.2002	0.1992	0.2586	0.2693	0.1236
Sz	0.0088	0.9605	0.2702	0.1222	-0.0398	0.8231	0.1988	0.2597	0.1247	0.4822	0.2862	0.1009
Sa	-0.0939	0.5974	0.2823	0.1058	-0.1503	0.3962	0.2377	0.1759	0.0765	0.667	0.4072	0.0169
Smr	0.202	0.2519	-0.1595	0.3674	0.2637	0.1318	-0.0775	0.6632	0.0486	0.7847	-0.2027	0.2504
Smc	-0.0609	0.7323	0.3321	0.055	-0.1306	0.4616	0.2397	0.1722	0.0993	0.5763	0.4179	0.0139
Sdc	-0.0869	0.625	0.2366	0.1779	-0.1185	0.5044	0.2679	0.1256	0.0801	0.6525	0.4064	0.0171
Sal	-0.1193	0.5016	0.093	0.6009	-0.1853	0.2941	-0.0607	0.7329	-0.017	0.9238	0.0146	0.9348
Str	0.0383	0.8299	-0.1698	0.3371	0.1331	0.453	0.1083	0.5421	0.0451	0.8001	-0.002	0.991
Std	0.0531	0.7653	-0.1269	0.4745	0.0559	0.7534	-0.2787	0.1104	-0.2332	0.1845	-0.3388	0.05
Sdq	-0.1986	0.2601	0.0833	0.6397	-0.1937	0.2724	0.2401	0.1713	-0.0214	0.9045	0.3529	0.0406
Sdr	-0.2056	0.2434	0.084	0.6366	-0.2025	0.2507	0.235	0.1809	-0.0284	0.8735	0.3481	0.0436
Vm	-0.1786	0.3121	0.2377	0.1758	-0.288	0.0986	-0.016	0.9286	-0.0832	0.6399	0.1585	0.3706
Vv	-0.0522	0.7693	0.3442	0.0462	-0.1269	0.4745	0.2329	0.1851	0.1012	0.5691	0.4129	0.0152
Vmc	-0.0905	0.6108	0.2844	0.103	-0.1419	0.4233	0.2618	0.1347	0.0902	0.612	0.4341	0.0103
Vvc	-0.0456	0.7981	0.3572	0.0381	-0.1286	0.4686	0.2104	0.2323	0.0908	0.6096	0.4003	0.019
Vvv	-0.0798	0.6537	0.2287	0.1932	-0.1173	0.5089	0.2217	0.2076	0.0566	0.7507	0.3429	0.0471
Spd	-0.1948	0.2697	-0.2584	0.14	-0.1164	0.5123	0.0002	0.9993	-0.2084	0.2369	0.038	0.8312
Spc	-0.108	0.5432	-0.0681	0.702	-0.0761	0.6689	0.1009	0.5703	0.0318	0.8585	0.055	0.7574
S10z	-0.0533	0.7647	0.2891	0.0973	-0.1078	0.5438	0.229	0.1927	0.0865	0.6269	0.3517	0.0414
S5p	-0.1839	0.2978	0.178	0.314	-0.2555	0.1447	0.0553	0.756	-0.0646	0.7166	0.2044	0.2463
S5v	0.0046	0.9792	0.2895	0.0967	-0.0279	0.8756	0.2934	0.0921	0.1512	0.3933	0.3849	0.0246
Sda	0.1136	0.5225	0.1625	0.3585	0.0482	0.7867	-0.081	0.6487	0.0624	0.7257	-0.0792	0.6563
Sha	0.3173	0.0675	0.2789	0.1102	0.2516	0.1512	-0.0279	0.8756	0.1605	0.3645	-0.0335	0.851
Sdv	0.0268	0.8804	0.0365	0.8375	0.0253	0.8873	-0.0005	0.9979	-0.038	0.8312	0.0011	0.9951
Shv	0.0959	0.5895	0.2526	0.1496	0.0665	0.7088	0.1715	0.3321	0.0652	0.714	0.2536	0.1478
Svd	-0.1352	0.4459	-0.1985	0.2605	-0.0717	0.6871	0.0091	0.9594	-0.1539	0.3847	0.0106	0.9525
Sk	-0.0596	0.7375	0.3073	0.077	-0.1269	0.4745	0.2019	0.2522	0.0665	0.7088	0.3776	0.0277
mea_projected	0.1571	0.3749	0.2317	0.1874	0.0632	0.7225	-0.0988	0.5781	0.1196	0.5005	-0.1119	0.5288
meh	-0.039	0.8265	0.2843	0.1032	-0.1063	0.5497	0.1701	0.3361	0.07	0.6939	0.2838	0.1038
matf	-0.0084	0.9625	0.2796	0.1092	-0.0397	0.8238	0.3027	0.0818	0.1314	0.4589	0.4069	0.0169
metf	-0.1461	0.4097	0.1894	0.2833	-0.1848	0.2953	0.1811	0.3053	-0.0404	0.8204	0.333	0.0543
medf	-0.004	0.982	0.0396	0.824	-0.035	0.8441	-0.0604	0.7343	0.0096	0.957	0	1
Tr1R	0.0861	0.6281	-0.0193	0.9135	0.0957	0.5901	-0.1177	0.5072	-0.1218	0.4927	-0.1506	0.3953
Tr2R	0.0158	0.9293	-0.2098	0.2336	0.0939	0.5974	-0.0741	0.6772	-0.1819	0.3032	-0.149	0.4002
Tr3R	-0.0513	0.7733	-0.2976	0.0874	0.0249	0.8886	-0.1247	0.4822	-0.1638	0.3547	-0.1808	0.3062
IsT	0.1808	0.3062	0.0627	0.7247	0.1951	0.2689	0.0736	0.6791	0.1263	0.4767	0.0051	0.9771
Asfc	-0.2017	0.2526	0.0223	0.9004	-0.1689	0.3397	0.2674	0.1263	-0.0108	0.9515	0.3554	0.0391
Hasfc	-0.2463	0.1602	-0.2242	0.2023	-0.2739	0.117	-0.2897	0.0965	-0.2157	0.2206	-0.3288	0.0576
Sfrax_epLsar	0.0282	0.8742	0.1125	0.5264	-0.0397	0.8238	-0.1131	0.5242	0.018	0.9196	-0.0669	0.7068
NewEplsar	0.0445	0.8028	-0.1318	0.4573	0.1024	0.5644	0.0153	0.9314	0.0002	0.9993	0.0287	0.8722

## Sheet: Table S9
Table S9. Correlations between mechanical properteis and dental microwear texture paraemters for the M2. Significant correlations are highlighted in green.
MP parameter	Young's modulus		max. Young's modulus		Yield stress		max. Yield stress		Hardness		max. Hardness
	Spearman		Spearman		Spearman		Spearman		Spearman		Spearman
DMTA parameter	Spearman ρ	sign.	Spearman ρ	sign.	Spearman ρ	sign.	Spearman ρ	sign.	Spearman ρ	sign.	Spearman ρ	sign.
Sq	0.1825	0.3015	0.1797	0.3091	0.2219	0.2073	0.4028	0.0182	0.3802	0.0265	0.4115	0.0156
Ssk	0.0319	0.8578	0.141	0.4264	-0.0304	0.8646	-0.0288	0.8715	0.0762	0.6683	0.0319	0.8578
Sku	-0.2702	0.1222	-0.2711	0.1209	-0.238	0.1753	-0.1571	0.3749	-0.26	0.1376	-0.2203	0.2106
Sp	0.0511	0.774	0.0561	0.7527	0.1153	0.5162	0.4131	0.0152	0.3545	0.0397	0.3722	0.0302
Sv	0.049	0.7833	0.0214	0.9045	0.1425	0.4213	0.4564	0.0067	0.3182	0.0666	0.4217	0.013
Sz	0.0917	0.6059	0.0744	0.6759	0.167	0.3451	0.4524	0.0072	0.3678	0.0323	0.4158	0.0144
Sa	0.1718	0.3312	0.1638	0.3547	0.2177	0.2162	0.411	0.0157	0.3763	0.0283	0.4287	0.0114
Smr	-0.1399	0.43	-0.2831	0.1048	-0.121	0.4954	-0.3249	0.0608	-0.3103	0.0741	-0.3732	0.0297
Smc	0.137	0.4399	0.1487	0.4012	0.1605	0.3645	0.3086	0.0757	0.3074	0.077	0.3347	0.053
Sdc	0.1822	0.3024	0.1766	0.3177	0.2547	0.146	0.5382	0.001	0.4378	0.0096	0.5447	0.0009
Sal	0.1233	0.4871	0.2157	0.2206	0.0988	0.5781	0.1943	0.2709	0.2188	0.2139	0.256	0.144
Str	-0.0499	0.7793	0.0967	0.5865	-0.0232	0.8962	0.3514	0.0416	0.2467	0.1596	0.3774	0.0278
Std	-0.0166	0.9259	0.0417	0.815	-0.0333	0.8516	-0.0237	0.8941	-0.0609	0.7323	-0.0008	0.9965
Sdq	0.1298	0.4643	0.0201	0.91	0.259	0.139	0.577	0.0004	0.4366	0.0098	0.5159	0.0018
Sdr	0.1814	0.3045	0.0844	0.6349	0.2911	0.0948	0.5588	0.0006	0.4473	0.008	0.5111	0.002
Vm	0.1433	0.4188	0.0875	0.6225	0.182	0.3028	0.2809	0.1076	0.3035	0.081	0.2577	0.1413
Vv	0.1336	0.4515	0.149	0.4002	0.1537	0.3855	0.2965	0.0886	0.3006	0.0841	0.3213	0.0639
Vmc	0.2044	0.2463	0.2363	0.1785	0.2248	0.2012	0.3928	0.0216	0.3816	0.026	0.4312	0.0109
Vvc	0.1108	0.5328	0.1222	0.491	0.1291	0.467	0.258	0.1408	0.2676	0.126	0.2893	0.0971
Vvv	0.1774	0.3155	0.1371	0.4394	0.2642	0.1311	0.5403	0.001	0.433	0.0105	0.5186	0.0017
Spd	-0.016	0.9286	-0.0178	0.9203	-0.0476	0.7894	-0.1969	0.2643	-0.1728	0.3285	-0.1669	0.3455
Spc	0.1469	0.4072	-0.0734	0.6798	0.2841	0.1034	0.4809	0.004	0.4366	0.0098	0.3251	0.0607
S10z	0.0761	0.6689	0.0522	0.7693	0.1693	0.3383	0.5071	0.0022	0.3897	0.0227	0.4758	0.0045
S5p	0.0232	0.8962	0.0217	0.9031	0.0821	0.6443	0.3532	0.0404	0.313	0.0715	0.3223	0.0631
S5v	0.073	0.6817	0.0308	0.8626	0.187	0.2896	0.5434	0.0009	0.3661	0.0332	0.5083	0.0021
Sda	0.04	0.8224	0.1267	0.4751	0.0229	0.8976	0.1512	0.3933	0.1831	0.2999	0.1776	0.3151
Sha	-0.0098	0.9563	0.1576	0.3735	-0.0315	0.8598	0.1452	0.4127	0.0516	0.772	0.2242	0.2024
Sdv	-0.0694	0.6965	-0.0988	0.5781	0.0251	0.8879	0.3266	0.0594	0.1726	0.329	0.2724	0.1191
Shv	0.1142	0.5202	0.2322	0.1863	0.1226	0.4899	0.3556	0.039	0.271	0.1211	0.3999	0.0191
Svd	0.0649	0.7153	-0.1065	0.549	0.0786	0.6587	-0.1873	0.2887	-0.1396	0.431	-0.2413	0.1693
Sk	0.1783	0.313	0.1799	0.3087	0.2124	0.2278	0.3782	0.0274	0.359	0.0371	0.4107	0.0158
mea_projected	0.0358	0.8407	0.0798	0.6537	0.0355	0.8421	0.1309	0.4605	0.1312	0.4594	0.1204	0.4977
meh	0.0727	0.683	0.0333	0.8516	0.1597	0.3668	0.4516	0.0073	0.359	0.0371	0.4141	0.0149
matf	0.0705	0.692	-0.0107	0.9522	0.2118	0.2292	0.6084	0.0001	0.4113	0.0157	0.5461	0.0008
metf	0.1788	0.3117	0.0896	0.6145	0.2931	0.0925	0.5813	0.0003	0.4447	0.0084	0.5568	0.0006
medf	0.079	0.6569	0.3353	0.0526	-0.0127	0.9431	0.1088	0.5403	0.154	0.3845	0.2268	0.197
Tr1R	0.0313	0.8605	0.1038	0.5591	-0.0189	0.9155	-0.0787	0.6582	-0.0266	0.8811	-0.0394	0.8251
Tr2R	-0.2262	0.1983	-0.1782	0.3134	-0.1952	0.2686	-0.0772	0.6645	-0.2569	0.1425	-0.0121	0.9459
Tr3R	-0.0028	0.9875	-0.0731	0.6811	0.0239	0.8934	-0.0338	0.8496	-0.0846	0.6343	-0.0589	0.7408
IsT	-0.0953	0.5919	-0.465	0.0056	0.0934	0.5992	0.1662	0.3474	0.0445	0.8028	0.0225	0.8996
Asfc	0.1903	0.2811	0.0598	0.7369	0.3043	0.0802	0.533	0.0012	0.4357	0.01	0.4701	0.005
Hasfc	0.0936	0.5986	-0.0394	0.8251	0.1624	0.3589	0.2516	0.1512	0.2776	0.1119	0.1317	0.4578
Sfrax_epLsar	0.0445	0.8028	0.2648	0.1302	-0.0959	0.5895	-0.1824	0.302	0.0138	0.9383	-0.121	0.4954
NewEplsar	-0.0256	0.8859	0.2276	0.1955	-0.1777	0.3147	-0.3134	0.0711	-0.1892	0.2839	-0.2264	0.198

## Sheet: Table S10
Table S10. Heteroscedastic pair-wise comparision test using the Wilxocon method. Significant differences are highlighted in red (p ≤ 0.05) and orange (p ≤ 0.01). P-values were corrected for multiple comparison using the Benjamini-Hochberg procedure with an accepted false discovery rate (FDR) of 0.25.
		Sq								Ssk								Sku								Sp								Sv								Sz
Level	- Level	Z	raw p-value	rank	crit. p-value			Level	- Level	Z	raw p-value	rank	crit. p-value			Level	- Level	Z	raw p-value	rank	crit. p-value			Level	- Level	Z	raw p-value	rank	crit. p-value			Level	- Level	Z	raw p-value	rank	crit. p-value			Level	- Level	Z	raw p-value	rank	crit. p-value			Level	- Level
fruit (M1)	daychicks (M1)	2.46475	0.0137	1	0.00694444	significant		vegetables (M1)	daychicks (M1)	2.64733	0.0081	1	0.00694444	significant		fruit (M1)	daychicks (M1)	-2.64733	0.0081	1	0.00694444	significant		daychicks (M1)	daychicks (M2)	2.80224	0.0051	1	0.00694444	significant		crickets (M1)	crickets (M2)	2.64211	0.0082	1	0.00694444	non significant		daychicks (M1)	daychicks (M2)	2.64211	0.0082	1	0.00694444	non significant		vegetables (M1)	vegetables (M2)
vegetables (M1)	vegetables (M2)	2.29783	0.0216	2	0.0138889	significant		fruit (M1)	daychicks (M1)	2.64733	0.0081	2	0.0138889	significant		vegetables (M2)	daychicks (M2)	-2.64733	0.0081	2	0.0138889	significant		vegetables (M1)	vegetables (M2)	2.50672	0.0122	2	0.0138889	significant		crickets (M2)	BSFL (M2)	2.0016	0.0453	2	0.0138889	non significant		crickets (M1)	crickets (M2)	2.32186	0.0202	2	0.0138889	non significant		fruit (M1)	daychicks (M1)
seeds (M1)	daychicks (M1)	2.16173	0.0306	3	0.0208333	significant		vegetables (M2)	seeds (M2)	2.64733	0.0081	3	0.0208333	significant		vegetables (M1)	daychicks (M1)	-2.46475	0.0137	3	0.0208333	significant		crickets (M1)	crickets (M2)	2.32186	0.0202	3	0.0208333	significant		seeds (M1)	BSFL (M1)	1.84147	0.0656	3	0.0208333	non significant		seeds (M2)	BSFL (M2)	2.0016	0.0453	3	0.0208333	non significant		seeds (M1)	daychicks (M1)
seeds (M1)	seeds (M2)	2.16173	0.0306	4	0.0277778	significant		vegetables (M1)	seeds (M1)	2.28218	0.0225	4	0.0277778	significant		vegetables (M2)	crickets (M2)	-2.28218	0.0225	4	0.0277778	significant		crickets (M2)	BSFL (M2)	2.16173	0.0306	4	0.0277778	significant		seeds (M2)	BSFL (M2)	1.84147	0.0656	4	0.0277778	non significant		crickets (M2)	BSFL (M2)	1.84147	0.0656	4	0.0277778	non significant		daychicks (M1)	crickets (M1)
daychicks (M1)	crickets (M1)	-2.0016	0.0453	5	0.0347222	significant		seeds (M1)	fruit (M1)	-2.28218	0.0225	5	0.0347222	significant		vegetables (M2)	seeds (M2)	-2.28218	0.0225	5	0.0347222	significant		fruit (M1)	BSFL (M1)	2.0996	0.0358	5	0.0347222	significant		seeds (M1)	seeds (M2)	1.68135	0.0927	5	0.0347222	non significant		seeds (M1)	seeds (M2)	1.84147	0.0656	5	0.0347222	non significant		crickets (M1)	crickets (M2)
daychicks (M1)	daychicks (M2)	2.0016	0.0453	6	0.0416667	significant		vegetables (M1)	BSFL (M1)	2.0996	0.0358	6	0.0416667	significant		seeds (M2)	daychicks (M2)	-2.0016	0.0453	6	0.0416667	significant		vegetables (M2)	BSFL (M2)	2.0996	0.0358	6	0.0416667	significant		vegetables (M1)	vegetables (M2)	1.67115	0.0947	6	0.0416667	non significant		fruit (M2)	crickets (M2)	-1.73445	0.0828	6	0.0416667	non significant		seeds (M1)	seeds (M2)
crickets (M1)	crickets (M2)	2.0016	0.0453	7	0.0486111	significant		fruit (M1)	BSFL (M1)	2.0996	0.0358	7	0.0486111	significant		vegetables (M1)	BSFL (M1)	-1.91703	0.0552	7	0.0486111	significant		seeds (M2)	BSFL (M2)	2.0016	0.0453	7	0.0486111	significant		fruit (M1)	BSFL (M1)	1.55188	0.1207	7	0.0486111	non significant		seeds (M1)	daychicks (M1)	1.68135	0.0927	7	0.0486111	non significant		daychicks (M1)	daychicks (M2)
fruit (M1)	BSFL (M1)	1.91703	0.0552	8	0.0555556	significant		vegetables (M2)	BSFL (M2)	1.91703	0.0552	8	0.0555556	significant		vegetables (M2)	BSFL (M2)	-1.91703	0.0552	8	0.0555556	significant		daychicks (M2)	BSFL (M2)	1.84147	0.0656	8	0.0555556	non significant		fruit (M2)	crickets (M2)	-1.55188	0.1207	8	0.0555556	non significant		fruit (M1)	BSFL (M1)	1.55188	0.1207	8	0.0555556	non significant		fruit (M1)	BSFL (M1)
vegetables (M2)	BSFL (M2)	1.91703	0.0552	9	0.0625	significant		vegetables (M1)	crickets (M1)	1.73445	0.0828	9	0.0625	non significant		fruit (M1)	BSFL (M1)	-1.73445	0.0828	9	0.0625	non significant		seeds (M1)	seeds (M2)	1.84147	0.0656	9	0.0625	non significant		daychicks (M1)	daychicks (M2)	1.52122	0.1282	9	0.0625	non significant		fruit (M1)	daychicks (M1)	1.55188	0.1207	9	0.0625	non significant		vegetables (M2)	BSFL (M2)
seeds (M1)	BSFL (M1)	1.84147	0.0656	10	0.0694444	significant		fruit (M1)	crickets (M1)	1.73445	0.0828	10	0.0694444	non significant		daychicks (M1)	crickets (M1)	1.68135	0.0927	10	0.0694444	non significant		seeds (M1)	fruit (M1)	-1.73445	0.0828	10	0.0694444	non significant		vegetables (M2)	crickets (M2)	-1.36931	0.1709	10	0.0694444	non significant		vegetables (M2)	BSFL (M2)	1.55188	0.1207	10	0.0694444	non significant		seeds (M1)	BSFL (M1)
seeds (M2)	BSFL (M2)	1.84147	0.0656	11	0.0763889	significant		seeds (M1)	seeds (M2)	1.68135	0.0927	11	0.0763889	non significant		vegetables (M2)	fruit (M2)	-1.46225	0.1437	11	0.0763889	non significant		vegetables (M1)	fruit (M1)	-1.67115	0.0947	11	0.0763889	non significant		seeds (M1)	daychicks (M1)	1.36109	0.1735	11	0.0763889	non significant		seeds (M1)	BSFL (M1)	1.52122	0.1282	11	0.0763889	non significant		seeds (M2)	BSFL (M2)
crickets (M2)	BSFL (M2)	1.68135	0.0927	12	0.0833333	non significant		vegetables (M2)	crickets (M2)	1.55188	0.1207	12	0.0833333	non significant		vegetables (M1)	seeds (M1)	-1.36931	0.1709	12	0.0833333	non significant		fruit (M1)	daychicks (M1)	1.55188	0.1207	12	0.0833333	non significant		seeds (M1)	crickets (M1)	1.20096	0.2298	12	0.0833333	non significant		daychicks (M2)	BSFL (M2)	1.52122	0.1282	12	0.0833333	non significant		crickets (M2)	BSFL (M2)
vegetables (M1)	fruit (M1)	-1.67115	0.0947	13	0.0902778	non significant		vegetables (M1)	vegetables (M2)	1.46225	0.1437	13	0.0902778	non significant		seeds (M1)	fruit (M1)	1.36931	0.1709	13	0.0902778	non significant		fruit (M2)	BSFL (M2)	1.36931	0.1709	13	0.0902778	non significant		seeds (M2)	daychicks (M2)	1.20096	0.2298	13	0.0902778	non significant		crickets (M1)	BSFL (M1)	1.20096	0.2298	13	0.0902778	non significant		vegetables (M1)	fruit (M1)
vegetables (M2)	fruit (M2)	1.46225	0.1437	14	0.0972222	non significant		fruit (M2)	crickets (M2)	1.36931	0.1709	14	0.0972222	non significant		seeds (M1)	daychicks (M1)	-1.36109	0.1735	14	0.0972222	non significant		crickets (M1)	BSFL (M1)	1.20096	0.2298	14	0.0972222	non significant		vegetables (M2)	BSFL (M2)	1.18673	0.2353	14	0.0972222	non significant		fruit (M2)	BSFL (M2)	1.18673	0.2353	14	0.0972222	non significant		vegetables (M2)	fruit (M2)
crickets (M1)	BSFL (M1)	1.36109	0.1735	15	0.104167	non significant		crickets (M1)	BSFL (M1)	1.20096	0.2298	15	0.104167	non significant		seeds (M2)	crickets (M2)	-1.20096	0.2298	15	0.104167	non significant		fruit (M1)	crickets (M1)	1.18673	0.2353	15	0.104167	non significant		seeds (M2)	fruit (M2)	1.18673	0.2353	15	0.104167	non significant		fruit (M1)	crickets (M1)	1.00416	0.3153	15	0.104167	non significant		vegetables (M1)	daychicks (M1)
BSFL (M1)	BSFL (M2)	1.20096	0.2298	16	0.111111	non significant		vegetables (M2)	daychicks (M2)	1.18673	0.2353	16	0.111111	non significant		daychicks (M1)	daychicks (M2)	-1.20096	0.2298	16	0.111111	non significant		daychicks (M1)	crickets (M1)	-1.04083	0.298	16	0.111111	non significant		daychicks (M2)	BSFL (M2)	1.04083	0.298	16	0.111111	non significant		seeds (M2)	fruit (M2)	1.00416	0.3153	16	0.111111	non significant		vegetables (M2)	daychicks (M2)
vegetables (M1)	daychicks (M1)	1.18673	0.2353	17	0.118056	non significant		fruit (M2)	BSFL (M2)	1.18673	0.2353	17	0.118056	non significant		vegetables (M1)	crickets (M1)	-1.18673	0.2353	17	0.118056	non significant		fruit (M2)	crickets (M2)	-1.00416	0.3153	17	0.118056	non significant		vegetables (M1)	seeds (M1)	-1.00416	0.3153	17	0.118056	non significant		seeds (M2)	daychicks (M2)	0.8807	0.3785	17	0.118056	non significant		crickets (M1)	BSFL (M1)
fruit (M1)	crickets (M1)	1.18673	0.2353	18	0.125	non significant		daychicks (M1)	crickets (M1)	-1.04083	0.298	18	0.125	non significant		fruit (M1)	crickets (M1)	-1.18673	0.2353	18	0.125	non significant		fruit (M2)	daychicks (M2)	-1.00416	0.3153	18	0.125	non significant		vegetables (M2)	seeds (M2)	-1.00416	0.3153	18	0.125	non significant		vegetables (M1)	fruit (M1)	-0.83557	0.4034	18	0.125	non significant		daychicks (M2)	crickets (M2)
vegetables (M2)	daychicks (M2)	1.18673	0.2353	19	0.131944	non significant		seeds (M2)	fruit (M2)	-1.00416	0.3153	19	0.131944	non significant		vegetables (M1)	vegetables (M2)	-1.04447	0.2963	19	0.131944	non significant		vegetables (M1)	crickets (M1)	-0.82158	0.4113	19	0.131944	non significant		crickets (M1)	BSFL (M1)	0.8807	0.3785	19	0.131944	non significant		vegetables (M1)	seeds (M1)	-0.82158	0.4113	19	0.131944	non significant		fruit (M1)	crickets (M1)
fruit (M2)	BSFL (M2)	1.18673	0.2353	20	0.138889	non significant		fruit (M2)	daychicks (M2)	1.00416	0.3153	20	0.138889	non significant		fruit (M2)	daychicks (M2)	-0.82158	0.4113	20	0.138889	non significant		seeds (M2)	fruit (M2)	0.82158	0.4113	20	0.138889	non significant		BSFL (M1)	BSFL (M2)	0.880705	0.3785	20	0.138889	non significant		vegetables (M1)	crickets (M1)	-0.63901	0.5228	20	0.138889	non significant		fruit (M2)	BSFL (M2)
seeds (M2)	daychicks (M2)	1.04083	0.298	21	0.145833	non significant		daychicks (M1)	daychicks (M2)	0.880705	0.3785	21	0.145833	non significant		seeds (M1)	BSFL (M1)	-0.72058	0.4712	21	0.145833	non significant		vegetables (M1)	BSFL (M1)	0.63901	0.5228	21	0.145833	non significant		vegetables (M1)	fruit (M1)	-0.83557	0.4034	21	0.145833	non significant		vegetables (M2)	seeds (M2)	-0.63901	0.5228	21	0.145833	non significant		seeds (M2)	daychicks (M2)
vegetables (M1)	BSFL (M1)	1.00416	0.3153	22	0.152778	non significant		seeds (M1)	crickets (M1)	-0.72058	0.4712	22	0.152778	non significant		daychicks (M1)	BSFL (M1)	0.72058	0.4712	22	0.152778	non significant		vegetables (M1)	daychicks (M1)	0.63901	0.5228	22	0.152778	non significant		daychicks (M2)	crickets (M2)	-0.72058	0.4712	22	0.152778	non significant		vegetables (M2)	fruit (M2)	0.62668	0.5309	22	0.152778	non significant		BSFL (M1)	BSFL (M2)
seeds (M2)	fruit (M2)	1.00416	0.3153	23	0.159722	non significant		vegetables (M2)	fruit (M2)	0.62668	0.5309	23	0.159722	non significant		crickets (M1)	BSFL (M1)	-0.72058	0.4712	23	0.159722	non significant		seeds (M1)	BSFL (M1)	0.56045	0.5752	23	0.159722	non significant		vegetables (M1)	crickets (M1)	-0.63901	0.5228	23	0.159722	non significant		seeds (M1)	crickets (M1)	0.56045	0.5752	23	0.159722	non significant		vegetables (M1)	BSFL (M1)
daychicks (M2)	crickets (M2)	-0.8807	0.3785	24	0.166667	non significant		crickets (M2)	BSFL (M2)	0.56045	0.5752	24	0.166667	non significant		seeds (M2)	BSFL (M2)	-0.72058	0.4712	24	0.166667	non significant		seeds (M1)	daychicks (M1)	0.56045	0.5752	24	0.166667	non significant		fruit (M1)	crickets (M1)	0.63901	0.5228	24	0.166667	non significant		BSFL (M1)	BSFL (M2)	0.560449	0.5752	24	0.166667	non significant		seeds (M2)	fruit (M2)
vegetables (M1)	seeds (M1)	-0.63901	0.5228	25	0.173611	non significant		seeds (M1)	BSFL (M1)	0.40032	0.6889	25	0.173611	non significant		fruit (M1)	fruit (M2)	0.62668	0.5309	25	0.173611	non significant		seeds (M2)	crickets (M2)	-0.56045	0.5752	25	0.173611	non significant		fruit (M2)	daychicks (M2)	-0.63901	0.5228	25	0.173611	non significant		vegetables (M2)	crickets (M2)	-0.45644	0.6481	25	0.173611	non significant		vegetables (M2)	crickets (M2)
seeds (M1)	fruit (M1)	-0.63901	0.5228	26	0.180556	non significant		daychicks (M2)	BSFL (M2)	0.40032	0.6889	26	0.180556	non significant		seeds (M1)	seeds (M2)	-0.560449	0.5752	26	0.180556	non significant		daychicks (M2)	crickets (M2)	-0.56045	0.5752	26	0.180556	non significant		daychicks (M1)	BSFL (M1)	0.56045	0.5752	26	0.180556	non significant		fruit (M2)	daychicks (M2)	-0.45644	0.6481	26	0.180556	non significant		daychicks (M1)	BSFL (M1)
vegetables (M2)	crickets (M2)	0.63901	0.5228	27	0.1875	non significant		BSFL (M1)	BSFL (M2)	0.40032	0.6889	27	0.1875	non significant		fruit (M2)	BSFL (M2)	-0.45644	0.6481	27	0.1875	non significant		seeds (M1)	crickets (M1)	-0.40032	0.6889	27	0.1875	non significant		fruit (M2)	BSFL (M2)	0.45644	0.6481	27	0.1875	non significant		daychicks (M1)	BSFL (M1)	0.40032	0.6889	27	0.1875	non significant		seeds (M1)	fruit (M1)
daychicks (M1)	BSFL (M1)	-0.56045	0.5752	28	0.194444	non significant		seeds (M1)	daychicks (M1)	0.24019	0.8102	28	0.194444	non significant		daychicks (M2)	BSFL (M2)	0.40032	0.6889	28	0.194444	non significant		BSFL (M1)	BSFL (M2)	0.40032	0.6889	28	0.194444	non significant		vegetables (M2)	fruit (M2)	0.41779	0.6761	28	0.194444	non significant		daychicks (M2)	crickets (M2)	-0.40032	0.6889	28	0.194444	non significant		fruit (M2)	crickets (M2)
vegetables (M1)	crickets (M1)	-0.45644	0.6481	29	0.201389	non significant		vegetables (M1)	fruit (M1)	-0.20889	0.8345	29	0.201389	non significant		daychicks (M2)	crickets (M2)	0.40032	0.6889	29	0.201389	non significant		vegetables (M2)	crickets (M2)	-0.27386	0.7842	29	0.201389	non significant		fruit (M1)	daychicks (M1)	0.27386	0.7842	29	0.201389	non significant		vegetables (M1)	daychicks (M1)	0.27386	0.7842	29	0.201389	non significant		vegetables (M1)	crickets (M1)
fruit (M2)	crickets (M2)	-0.45644	0.6481	30	0.208333	non significant		fruit (M1)	fruit (M2)	-0.208893	0.8345	30	0.208333	non significant		crickets (M1)	crickets (M2)	0.40032	0.6889	30	0.208333	non significant		vegetables (M2)	daychicks (M2)	-0.27386	0.7842	30	0.208333	non significant		seeds (M2)	crickets (M2)	-0.24019	0.8102	30	0.208333	non significant		daychicks (M1)	crickets (M1)	-0.24019	0.8102	30	0.208333	non significant		vegetables (M1)	seeds (M1)
daychicks (M2)	BSFL (M2)	0.40032	0.6889	31	0.215278	non significant		daychicks (M1)	BSFL (M1)	-0.08006	0.9362	31	0.215278	non significant		BSFL (M1)	BSFL (M2)	-0.40032	0.6889	31	0.215278	non significant		fruit (M1)	fruit (M2)	0.208893	0.8345	31	0.215278	non significant		vegetables (M1)	BSFL (M1)	0.09129	0.9273	31	0.215278	non significant		seeds (M2)	crickets (M2)	-0.24019	0.8102	31	0.215278	non significant		vegetables (M2)	seeds (M2)
seeds (M1)	crickets (M1)	0.24019	0.8102	32	0.222222	non significant		daychicks (M2)	crickets (M2)	-0.08006	0.9362	32	0.222222	non significant		fruit (M2)	crickets (M2)	-0.09129	0.9273	32	0.222222	non significant		vegetables (M1)	seeds (M1)	0.09129	0.9273	32	0.222222	non significant		vegetables (M1)	daychicks (M1)	-0.09129	0.9273	32	0.222222	non significant		seeds (M1)	fruit (M1)	-0.09129	0.9273	32	0.222222	non significant		seeds (M1)	crickets (M1)
seeds (M2)	crickets (M2)	0.24019	0.8102	33	0.229167	non significant		seeds (M2)	BSFL (M2)	0	1	33	0.229167	non significant		vegetables (M1)	fruit (M1)	0	1	33	0.229167	non significant		seeds (M2)	daychicks (M2)	0.08006	0.9362	33	0.229167	non significant		vegetables (M2)	daychicks (M2)	-0.09129	0.9273	33	0.229167	non significant		vegetables (M2)	daychicks (M2)	-0.09129	0.9273	33	0.229167	non significant		seeds (M2)	crickets (M2)
vegetables (M2)	seeds (M2)	0.09129	0.9273	34	0.236111	non significant		seeds (M2)	crickets (M2)	0	1	34	0.236111	non significant		seeds (M1)	crickets (M1)	0	1	34	0.236111	non significant		daychicks (M1)	BSFL (M1)	0	1	34	0.236111	non significant		daychicks (M1)	crickets (M1)	0.08006	0.9362	34	0.236111	non significant		vegetables (M1)	BSFL (M1)	0	1	34	0.236111	non significant		daychicks (M2)	BSFL (M2)
fruit (M2)	daychicks (M2)	0	1	35	0.243056	non significant		seeds (M2)	daychicks (M2)	0	1	35	0.243056	non significant		seeds (M2)	fruit (M2)	0	1	35	0.243056	non significant		vegetables (M2)	fruit (M2)	0	1	35	0.243056	non significant		seeds (M1)	fruit (M1)	0	1	35	0.243056	non significant		fruit (M1)	fruit (M2)	0	1	35	0.243056	non significant		fruit (M2)	daychicks (M2)
fruit (M1)	fruit (M2)	0	1	36	0.25	non significant		crickets (M1)	crickets (M2)	0	1	36	0.25	non significant		crickets (M2)	BSFL (M2)	0	1	36	0.25	non significant		vegetables (M2)	seeds (M2)	0	1	36	0.25	non significant		fruit (M1)	fruit (M2)	0	1	36	0.25	non significant		vegetables (M1)	vegetables (M2)	2.29783	0.0216*	36	0.25	non significant		fruit (M1)	fruit (M2)
[truncated: 243 more columns]

[truncated: 1 more sheets: Table S11]
